# Supplementary material for: Stereoselective synthesis of the bicyclic guanidine alkaloid (+)-monanchorin
Source: Royal Society of Chemistry journal article supplement (doi:10.1039/c0ob00219d), 2010-01-01

**Supporting Information for:**

**Stereoselective Synthesis Of The Bicyclic Guanidine Alkaloid (+)-Monanchorin**

Ahmed M. Zaed and Andrew Sutherland\*

*WestCHEM, Department of Chemistry, The Joseph Black Building, University of Glasgow,  
Glasgow, UK G12 8QQ. Email: andrews@chem.gla.ac.uk*

**Table of Contents**

1.  $^1\text{H}$  NMR and  $^{13}\text{C}$  NMR Spectra of Compounds **3**, **4**, **5**, **9**, **10**, **11**, **12**, **15** and **17** S2–S19

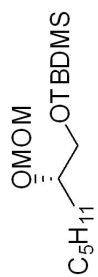

9

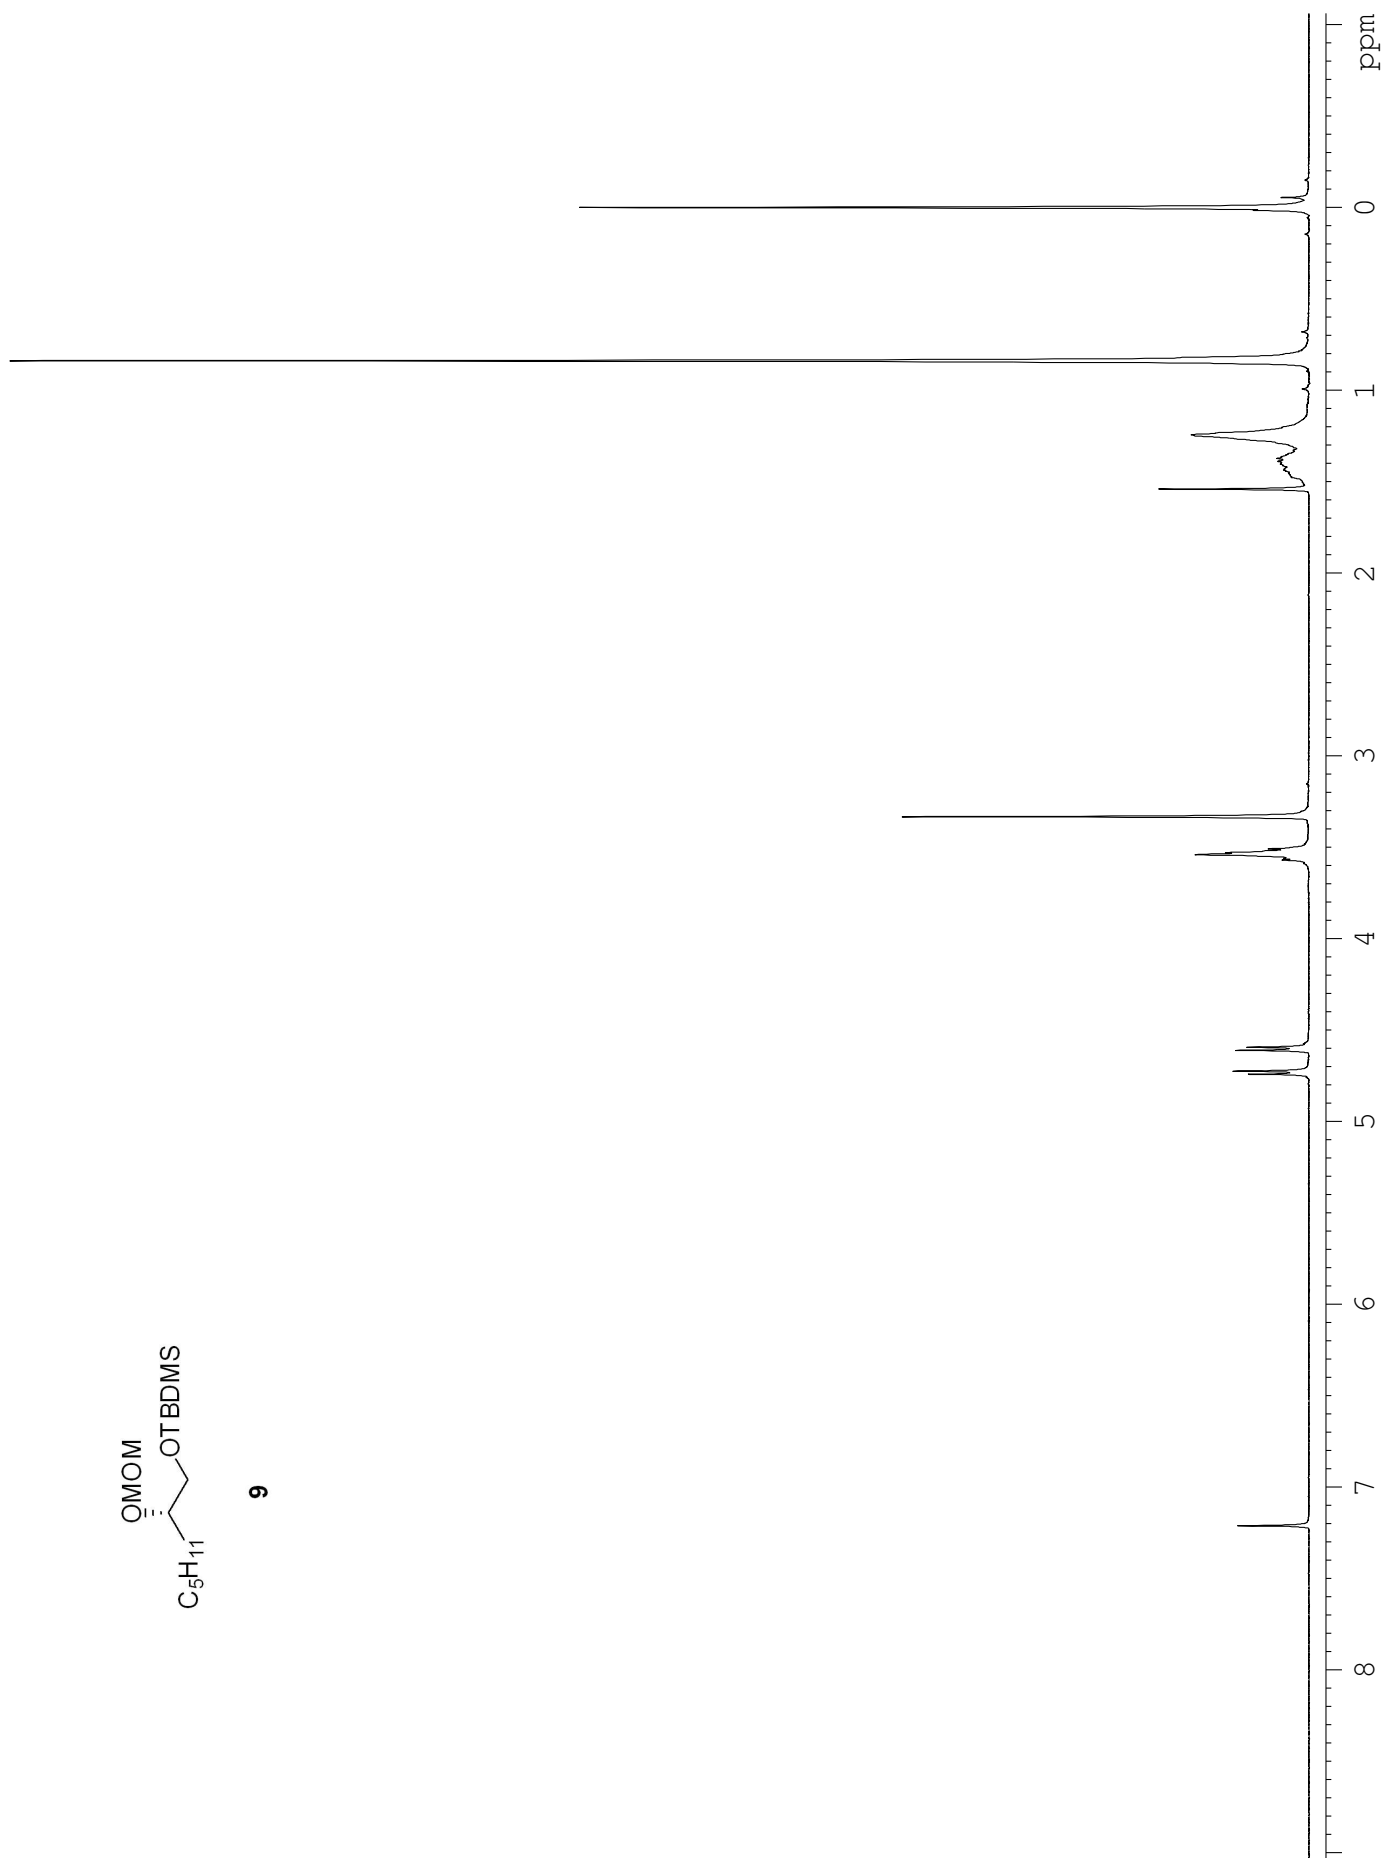

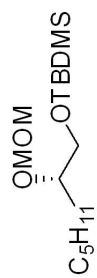

**9**

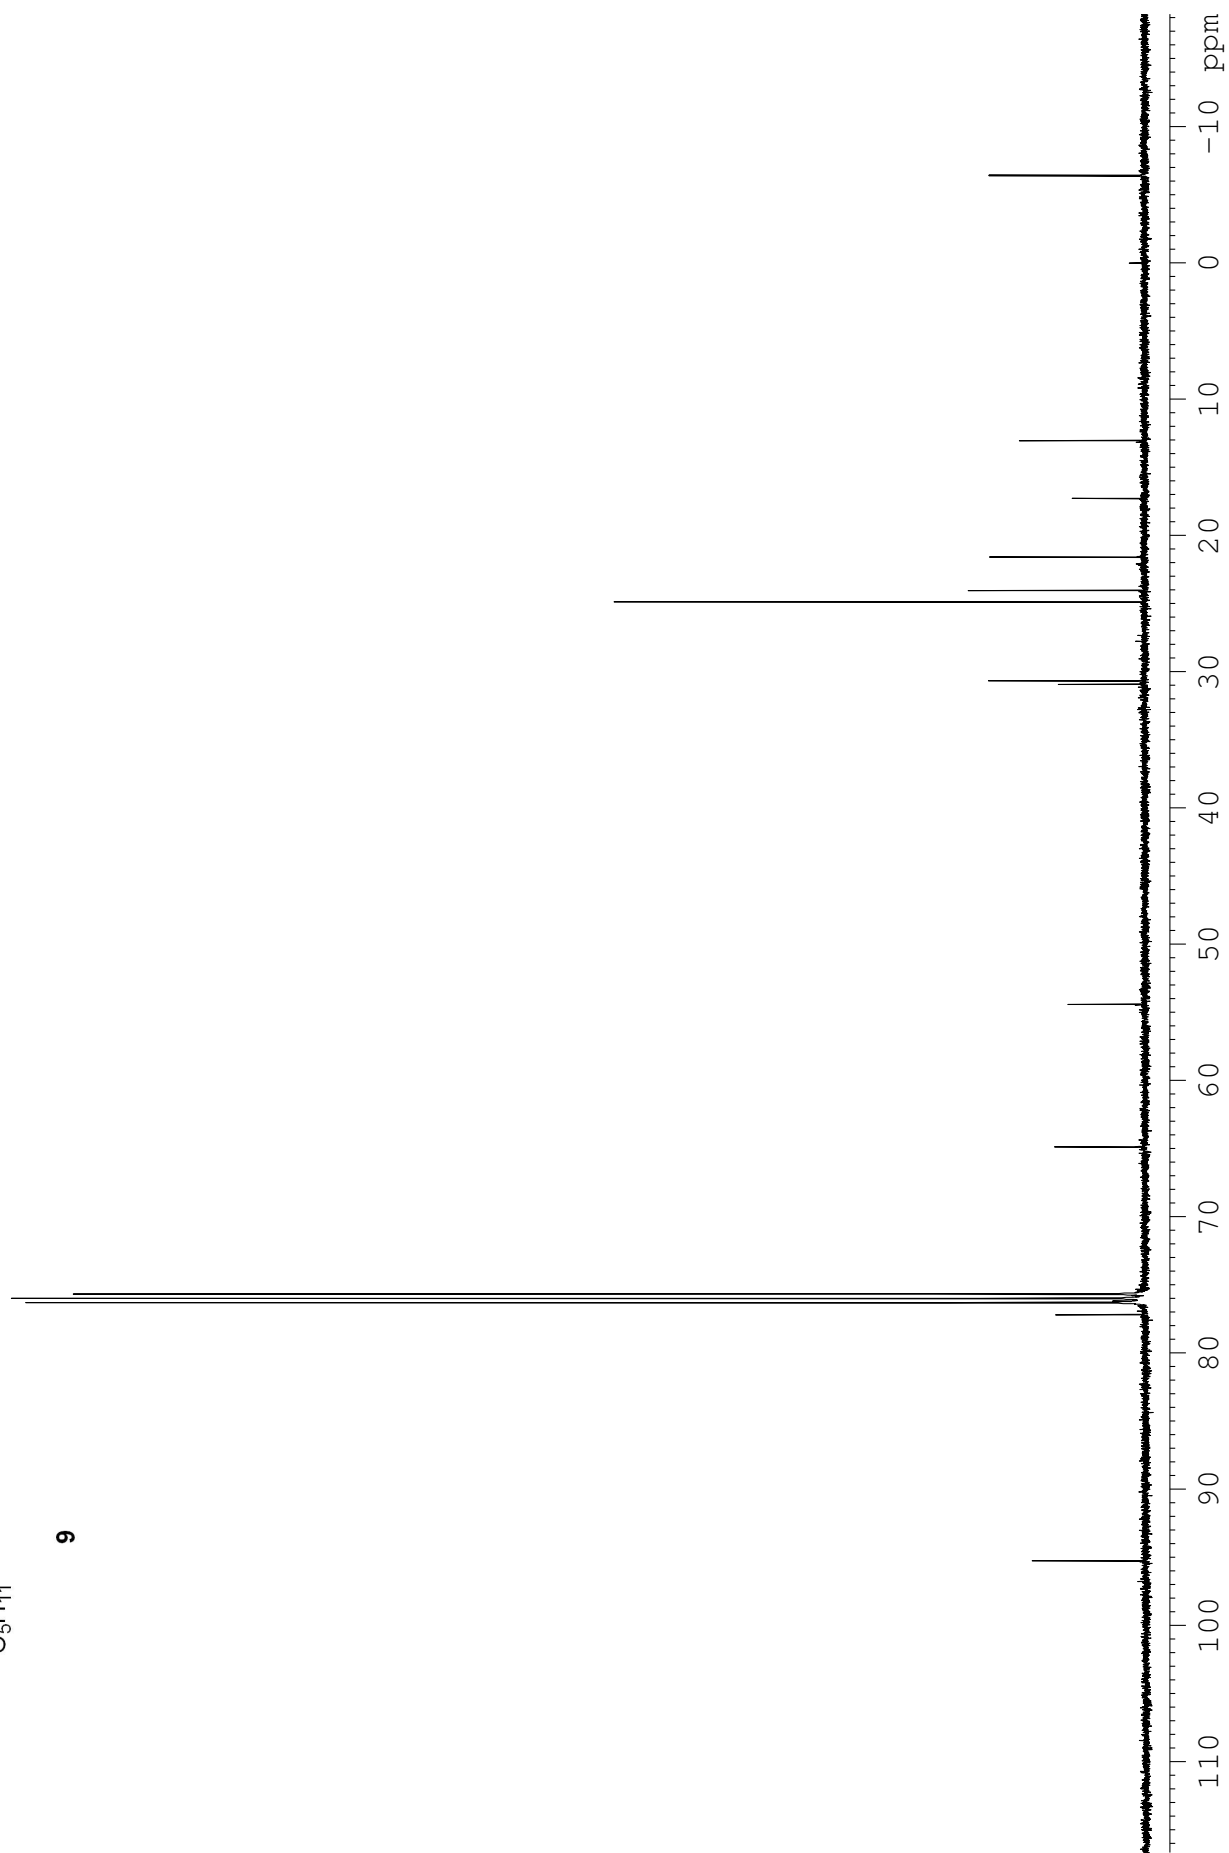

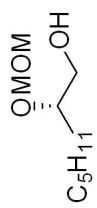

**10**

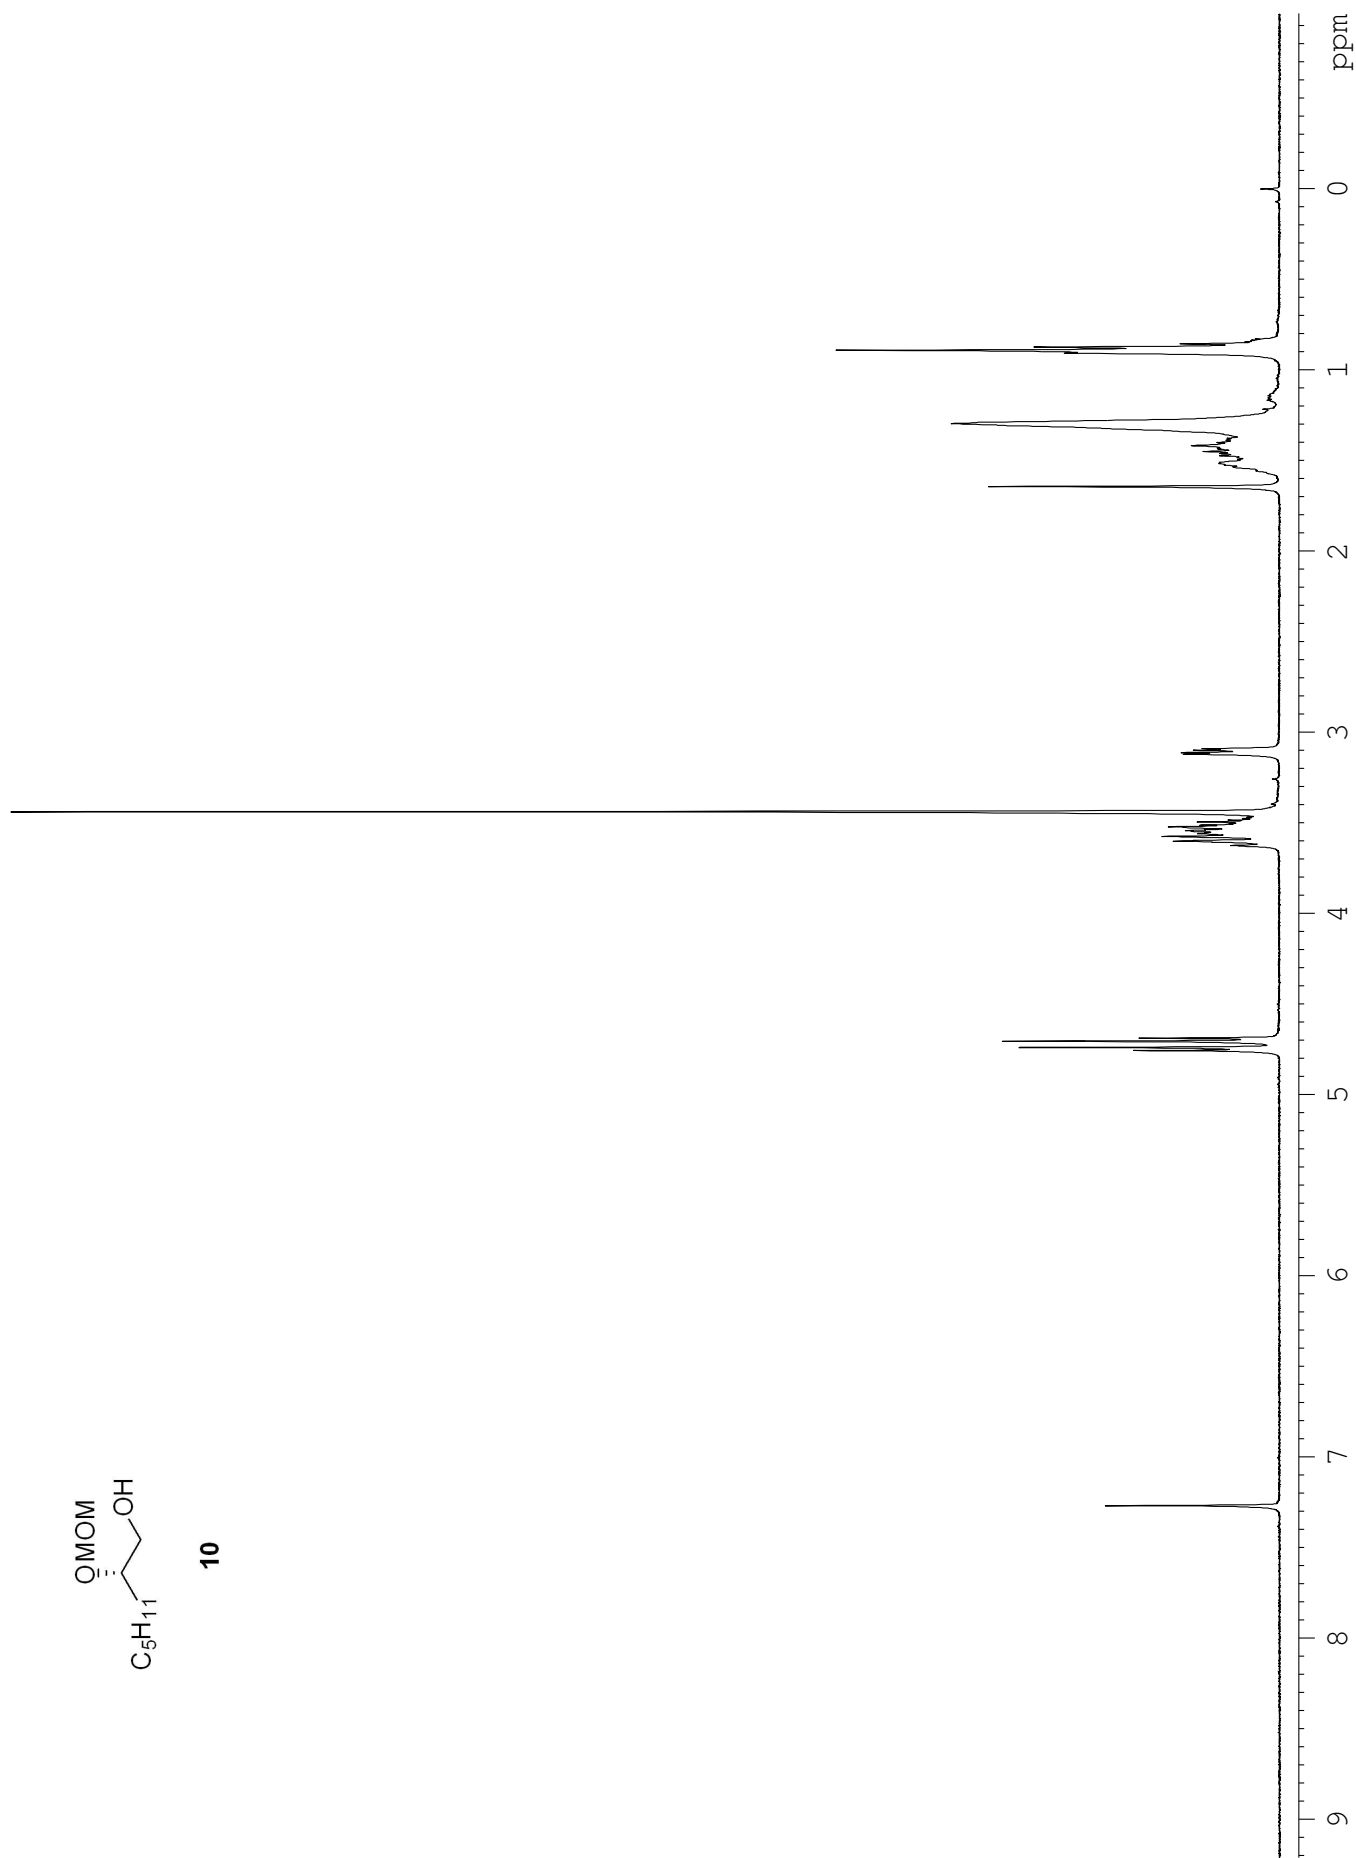

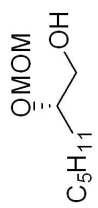

**10**

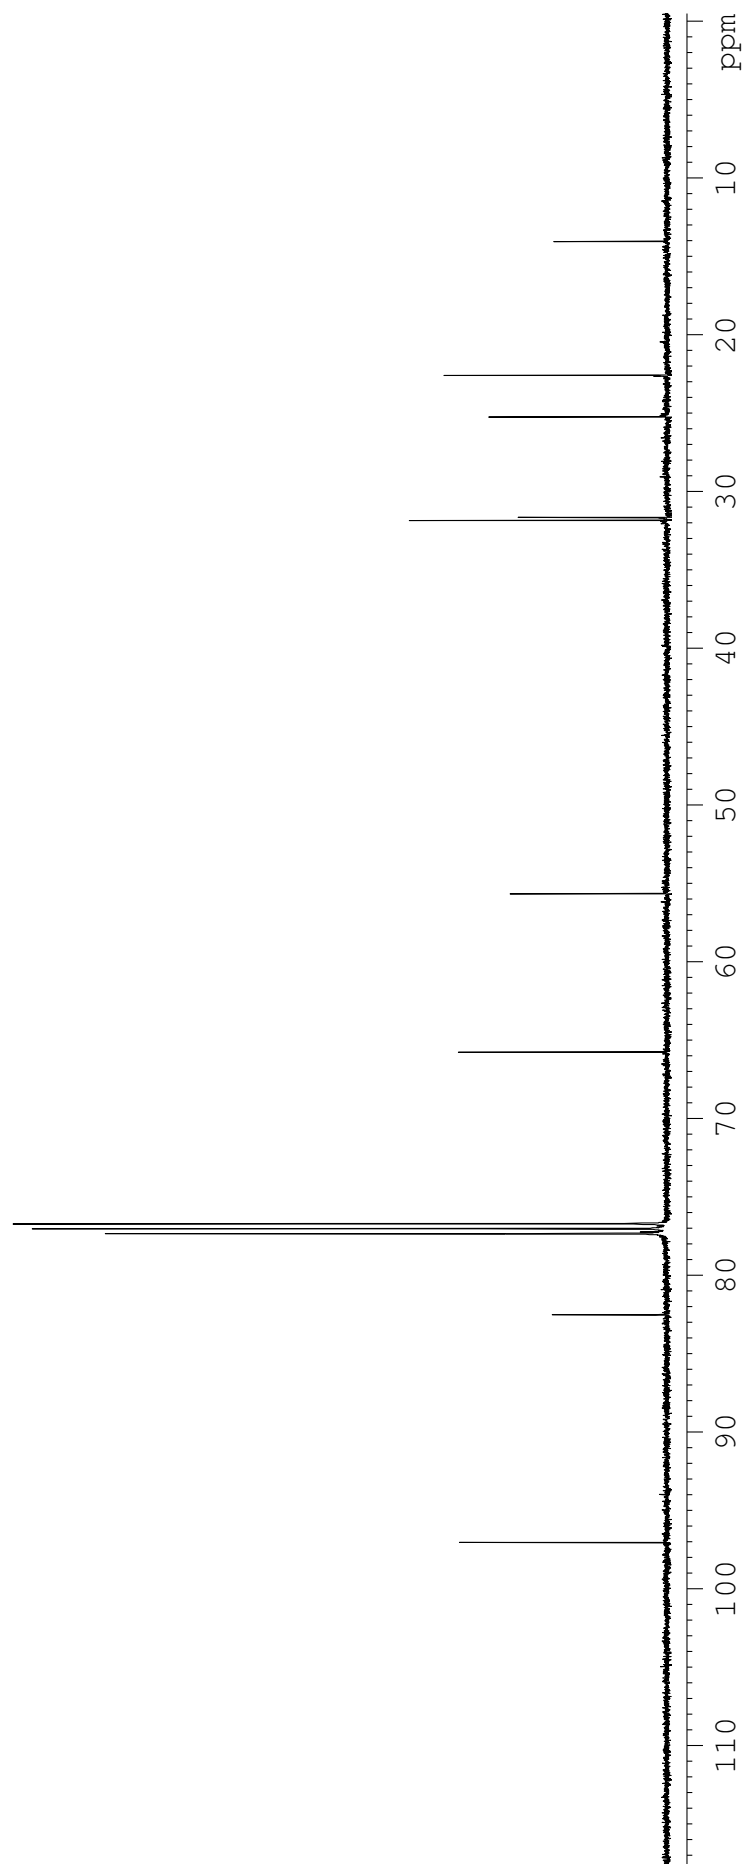

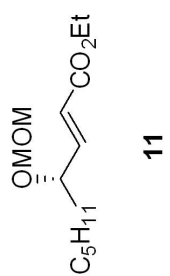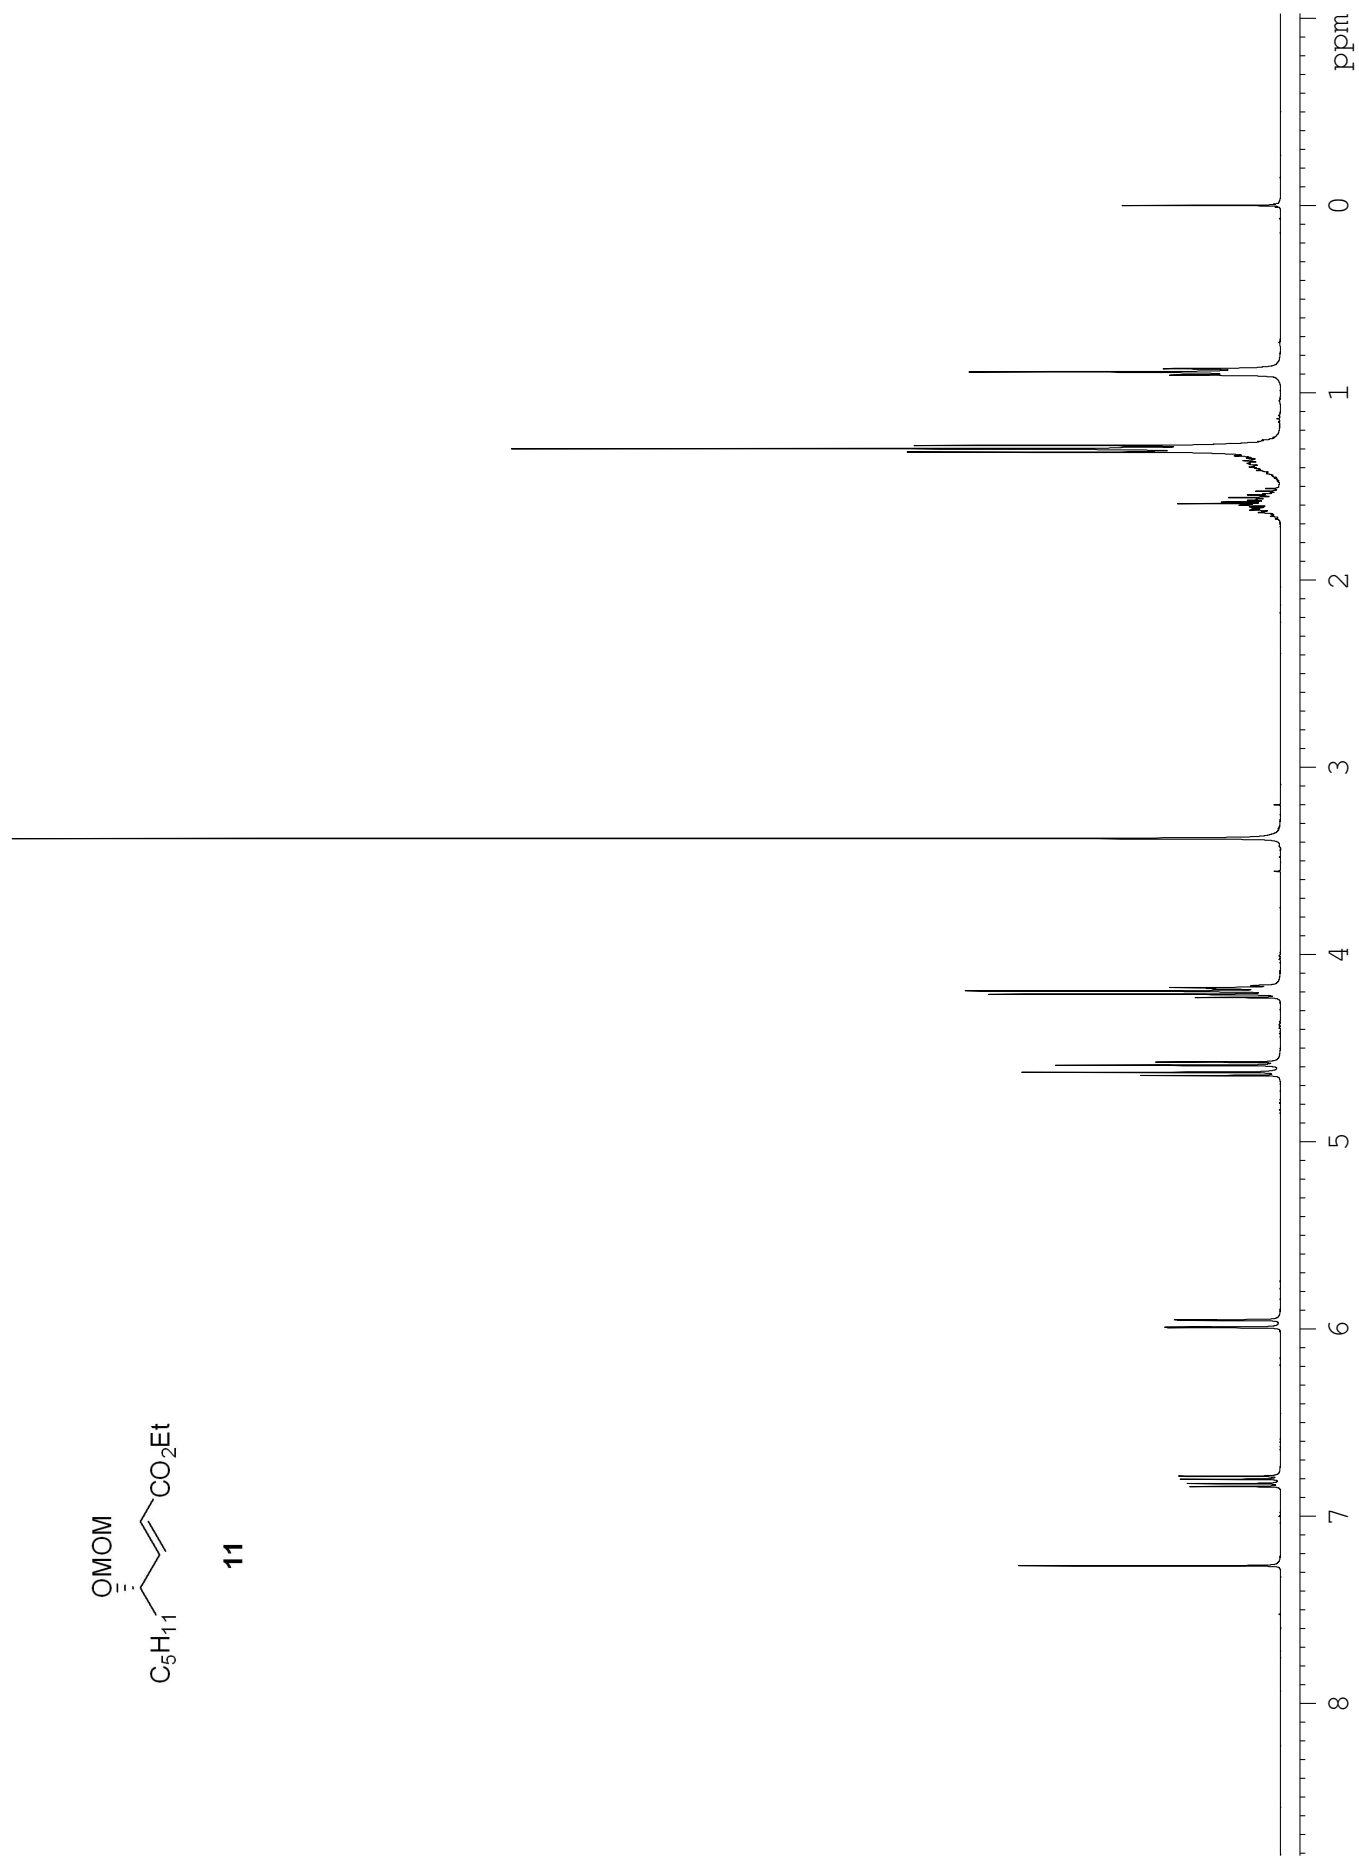

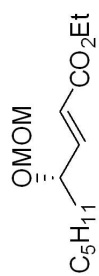

11

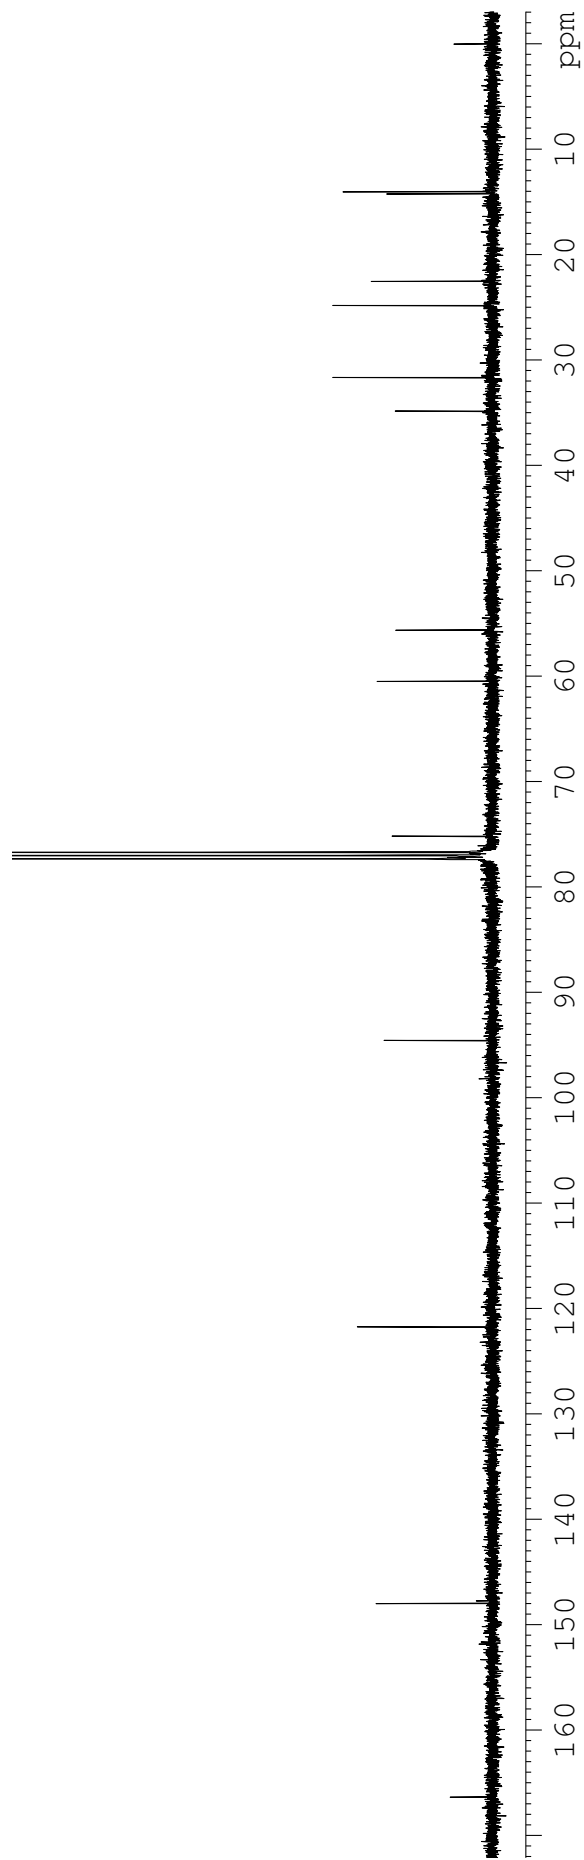

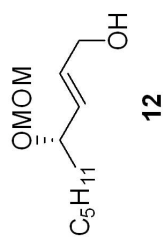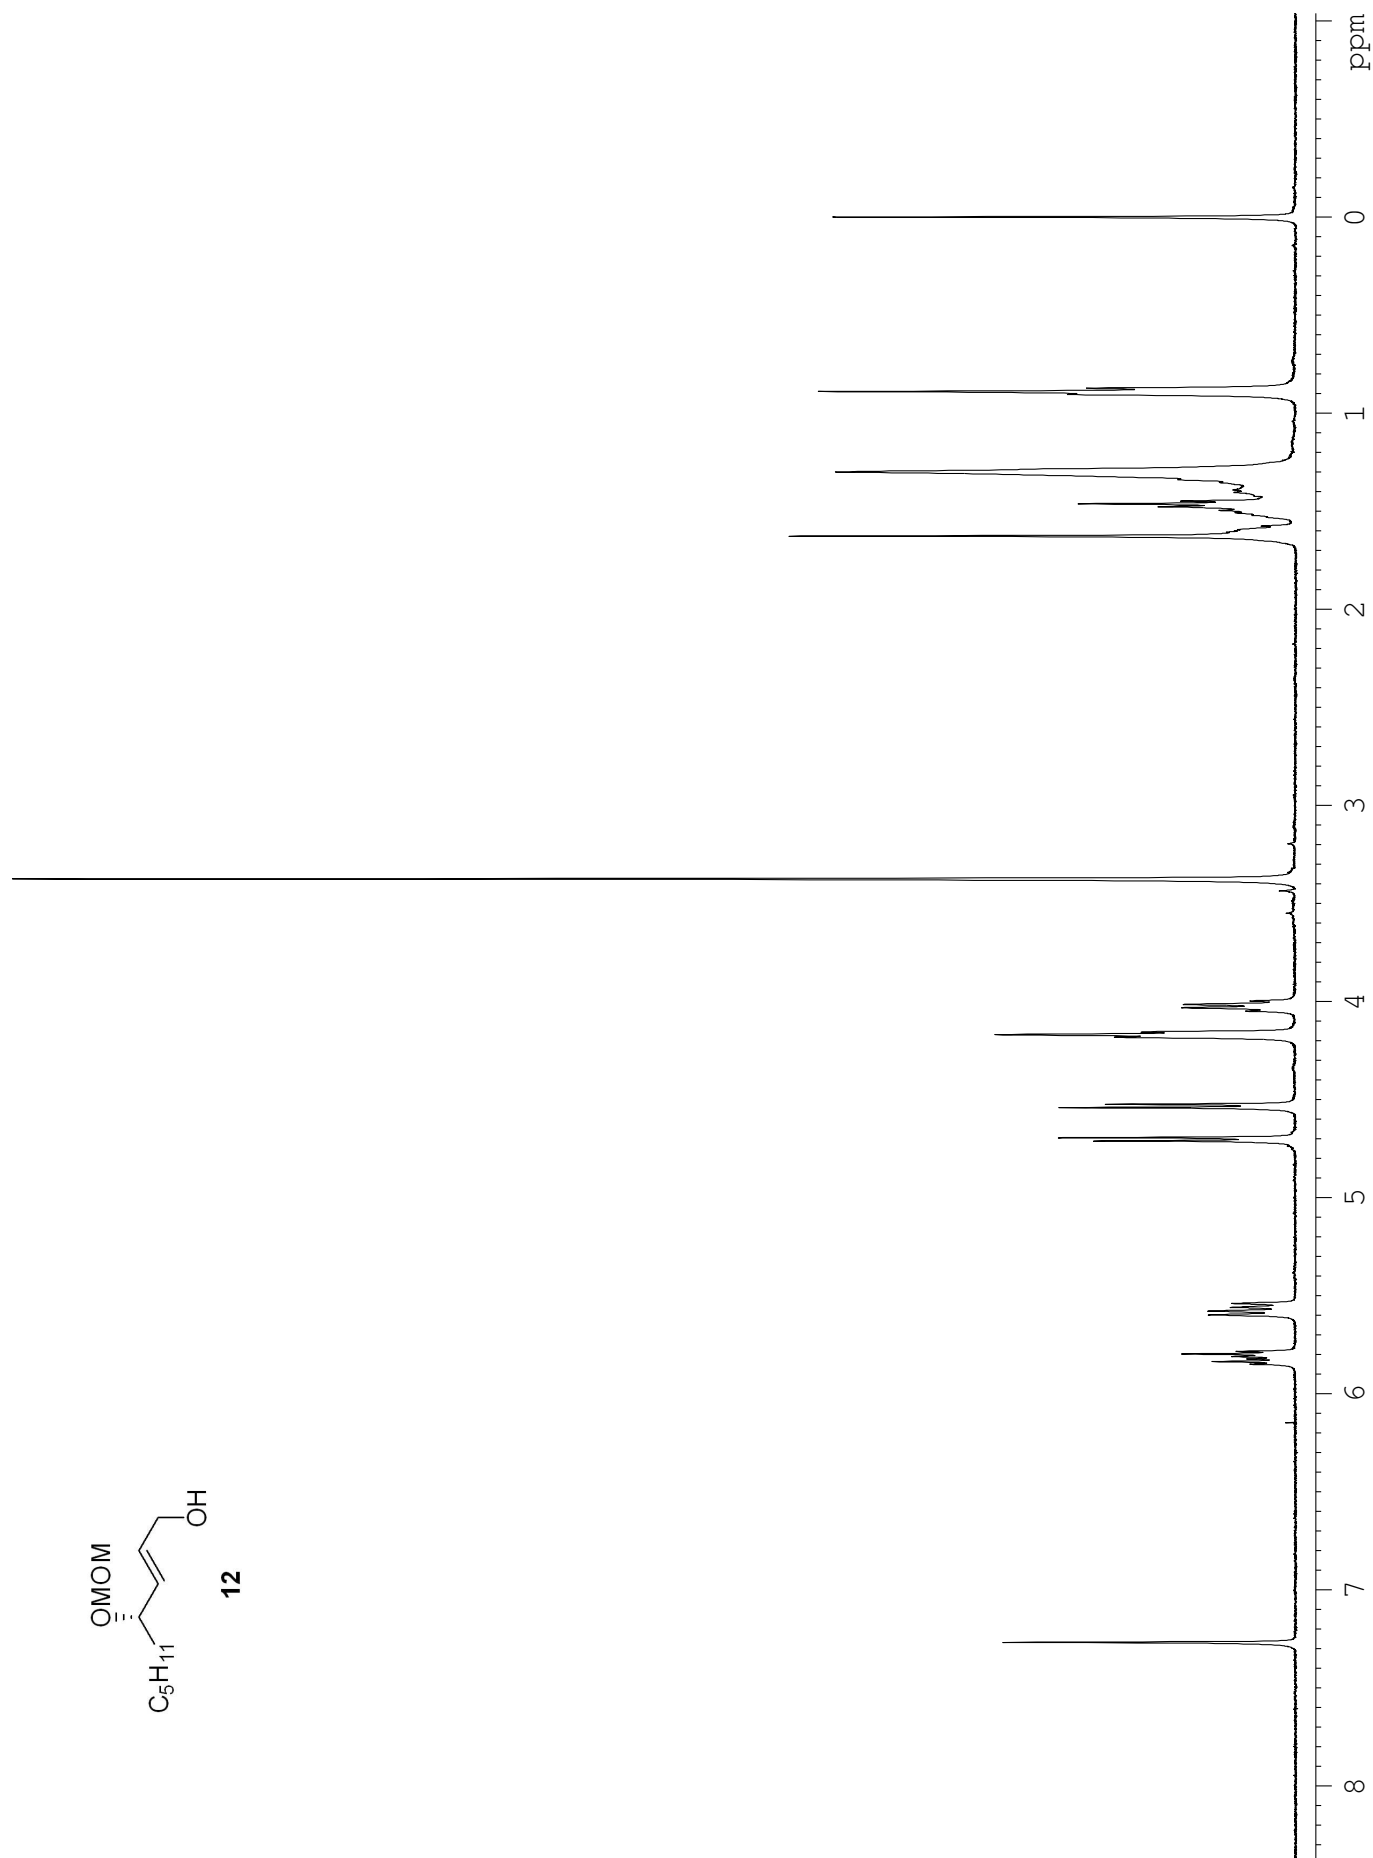



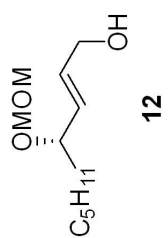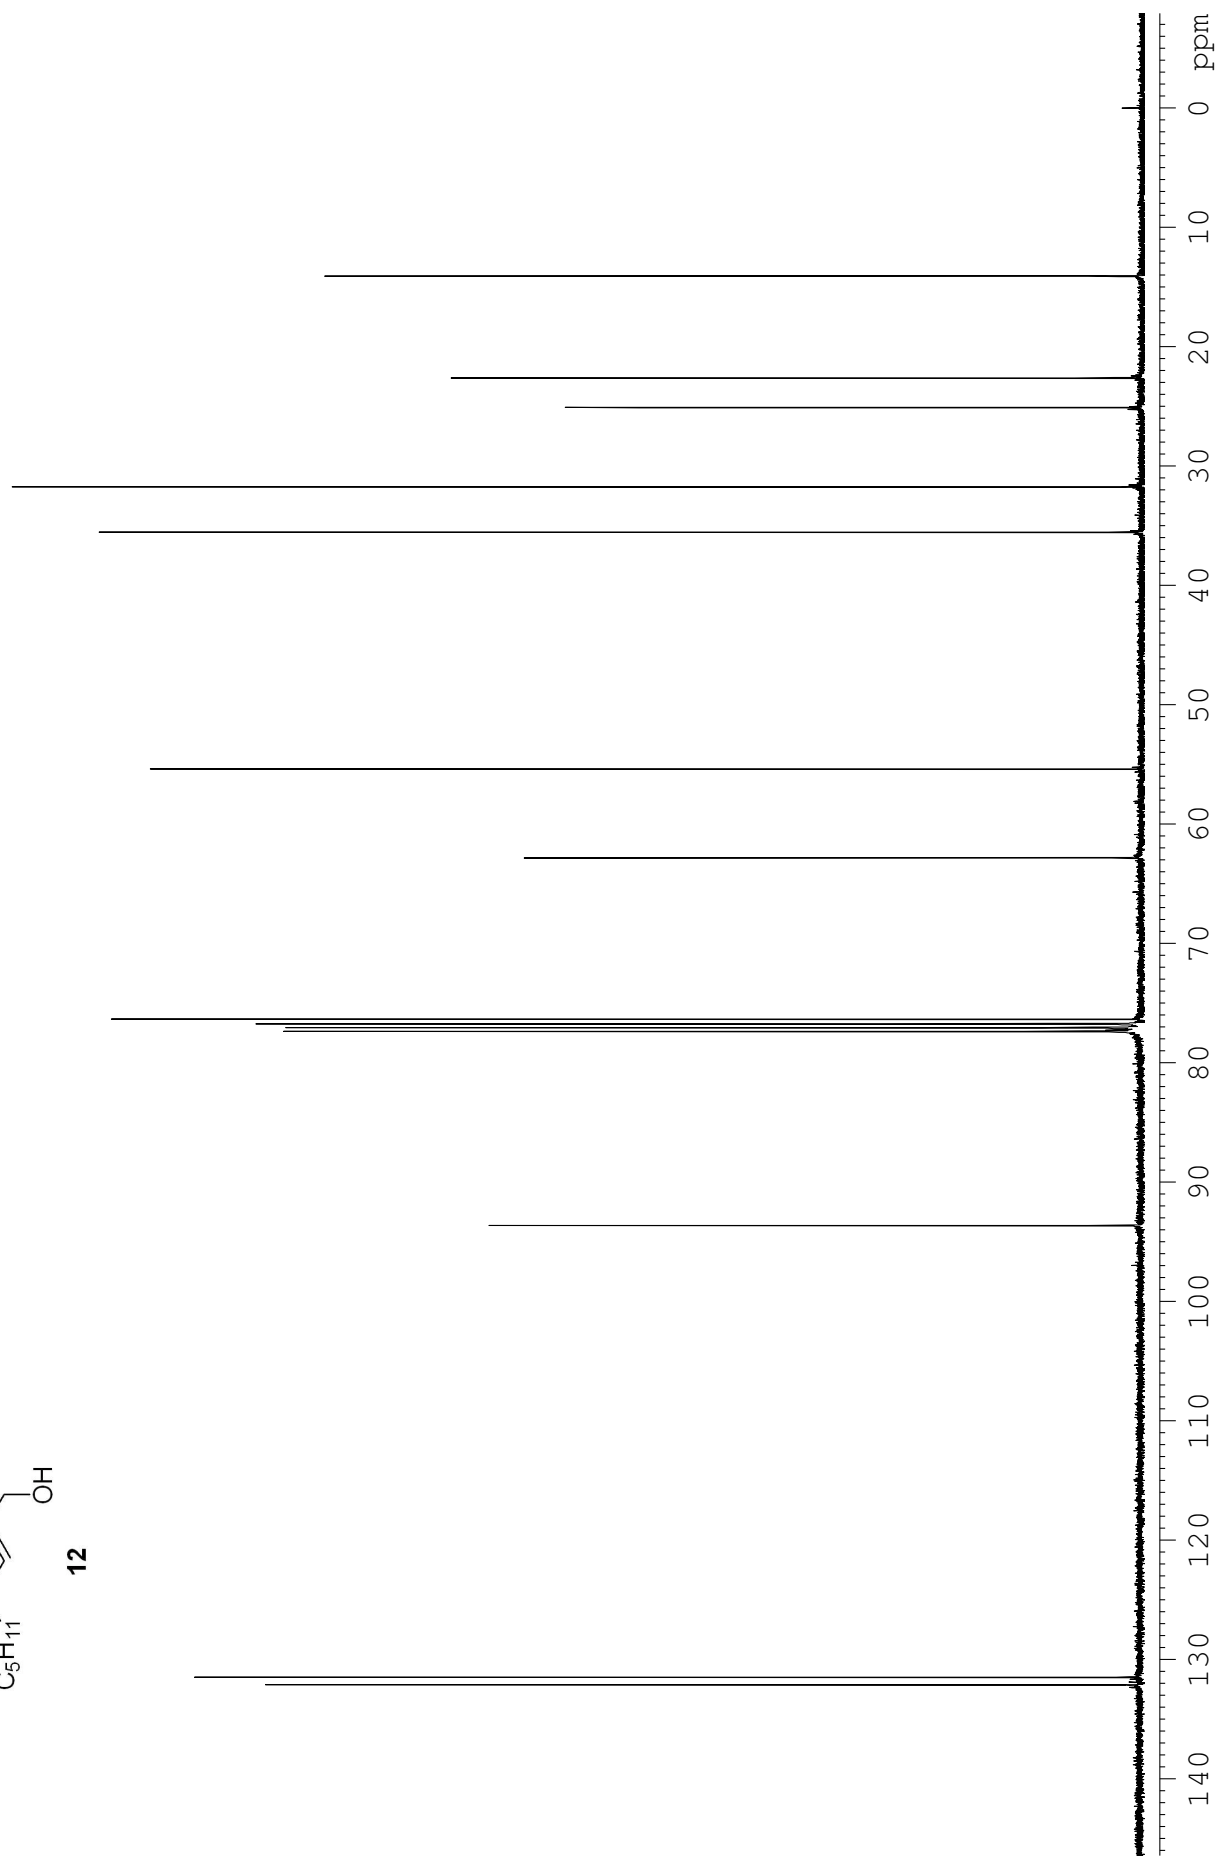

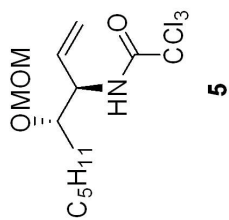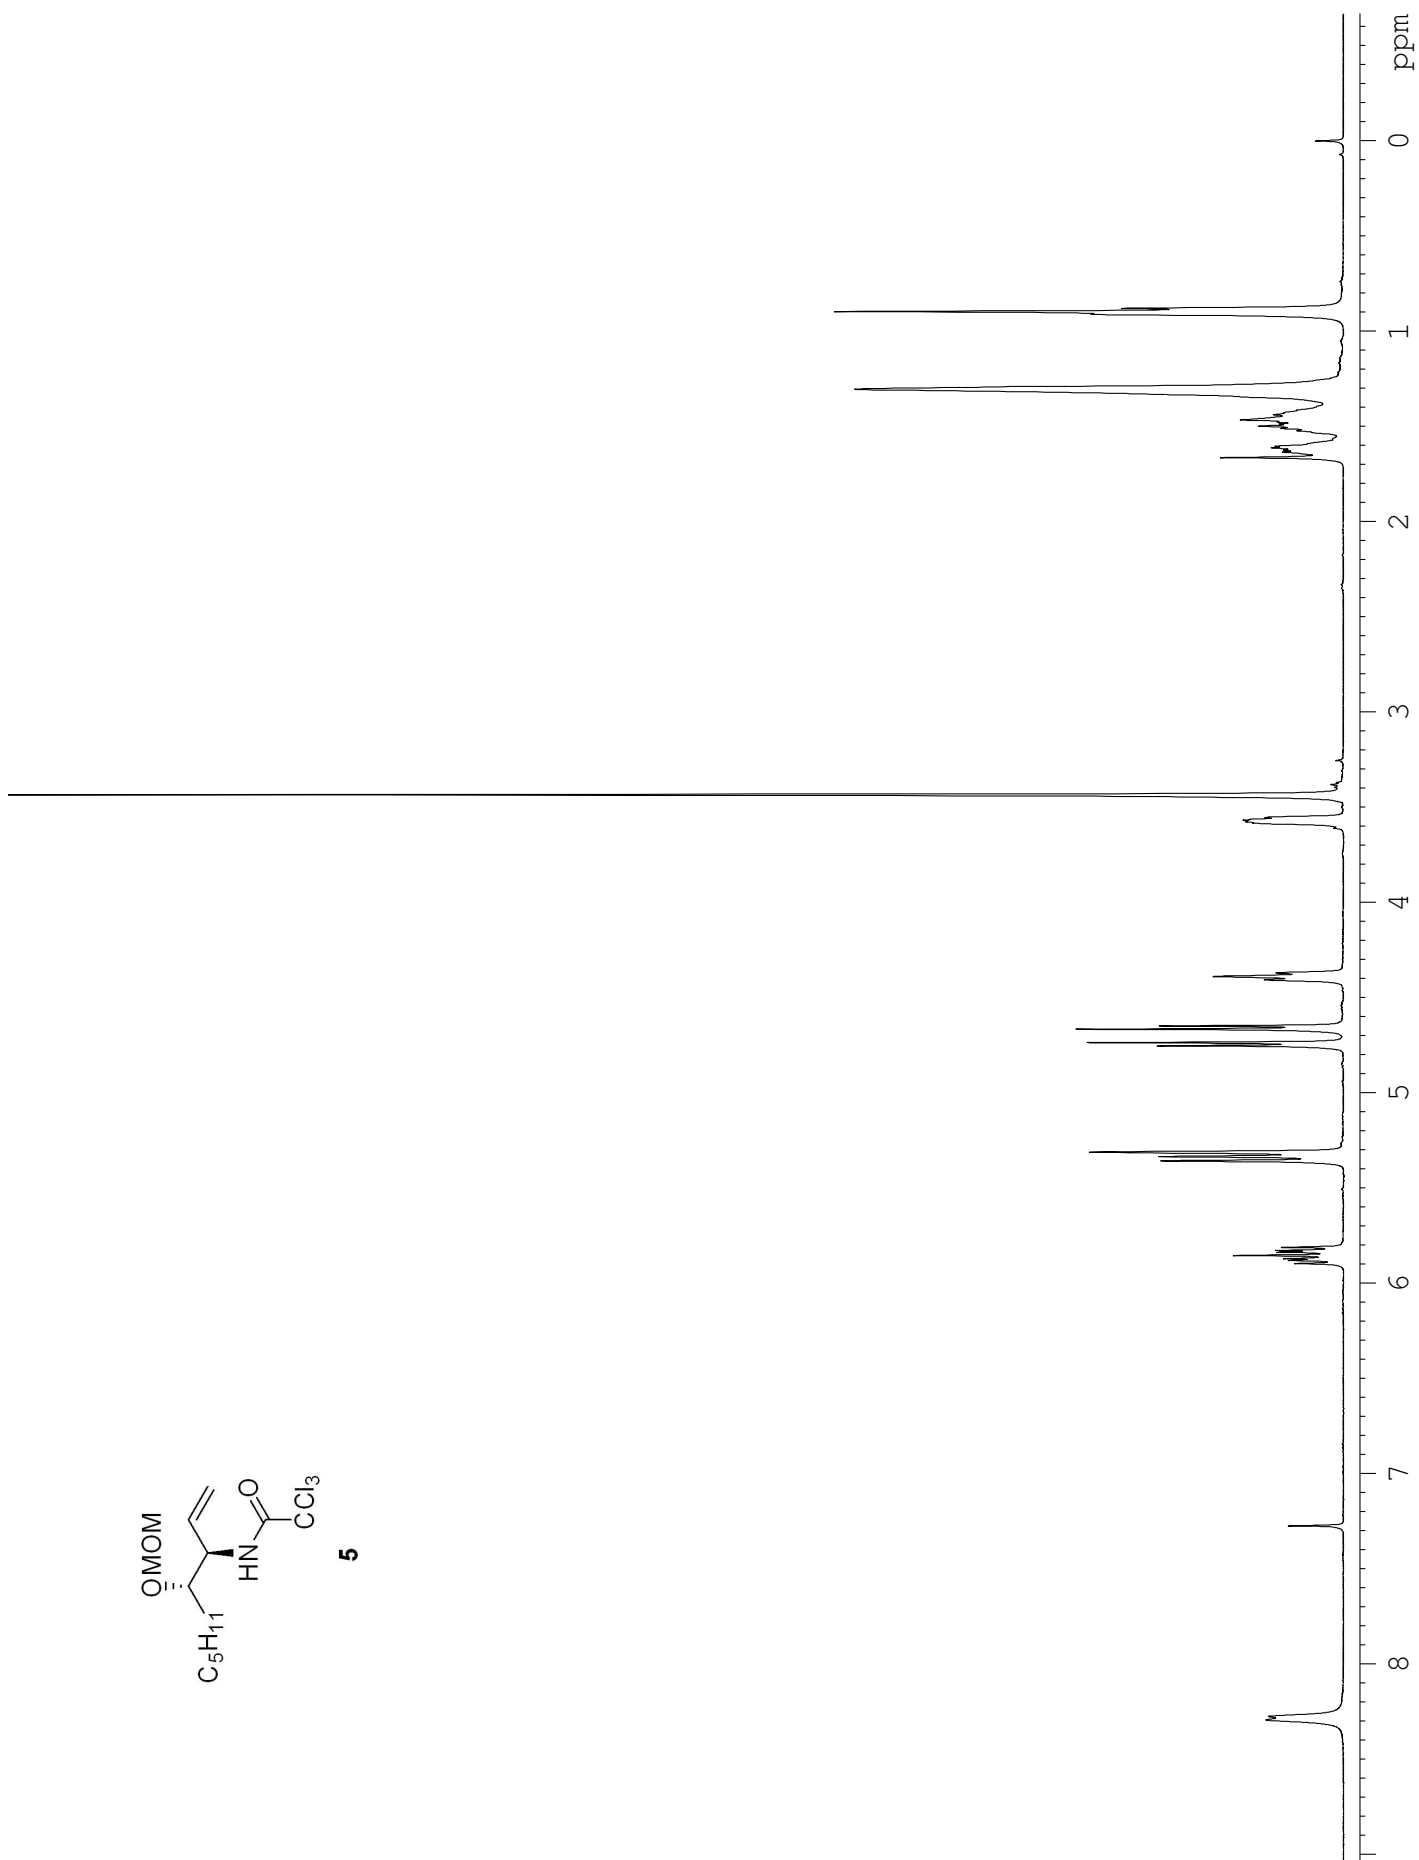

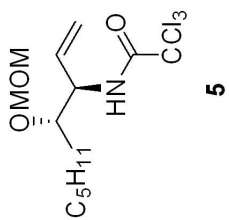

5

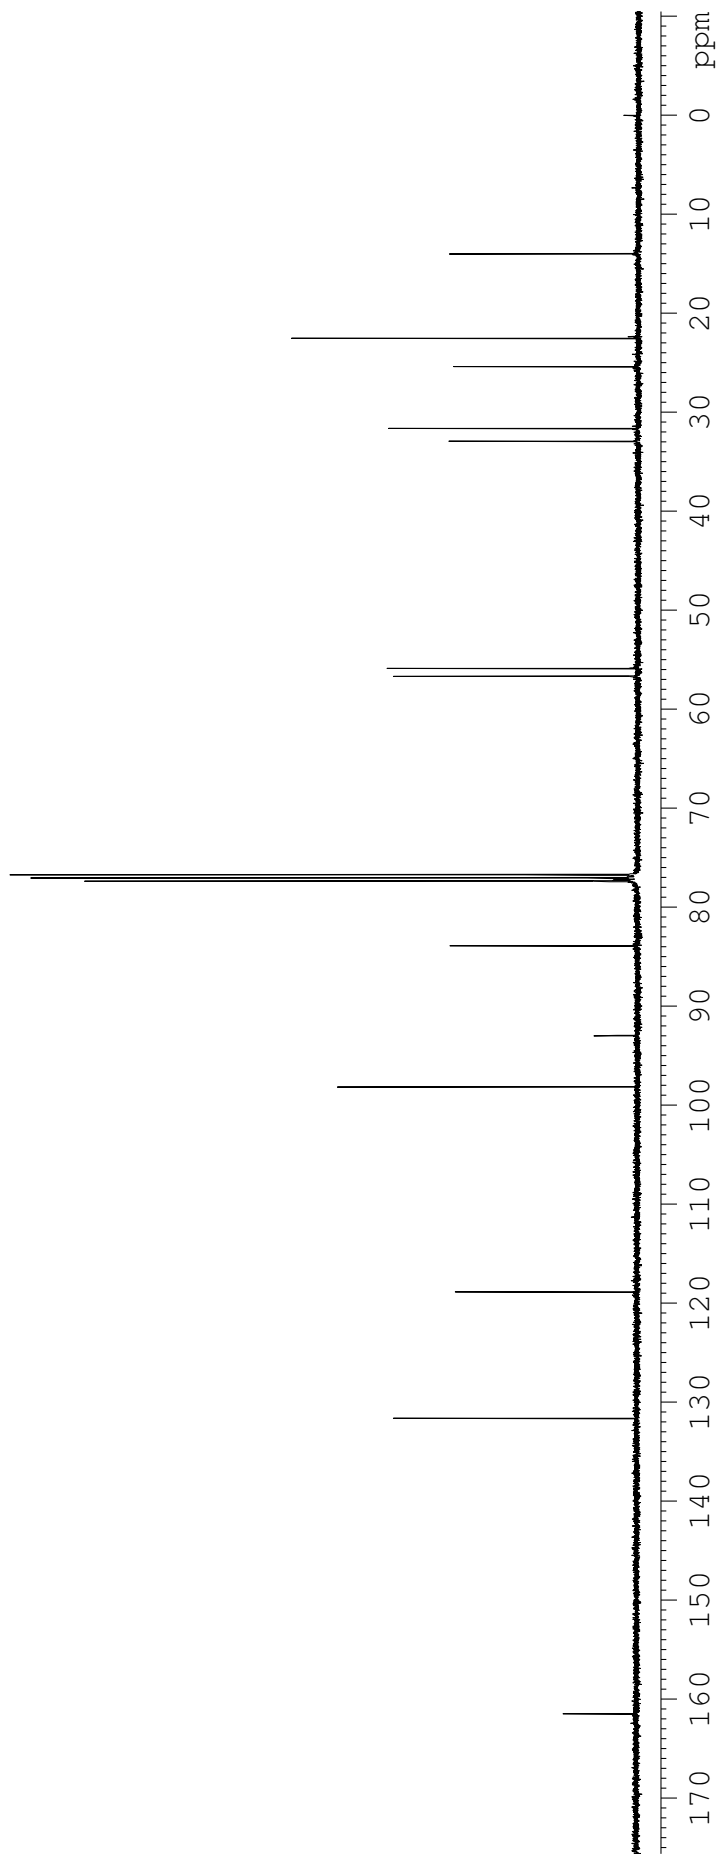

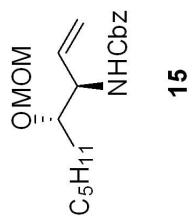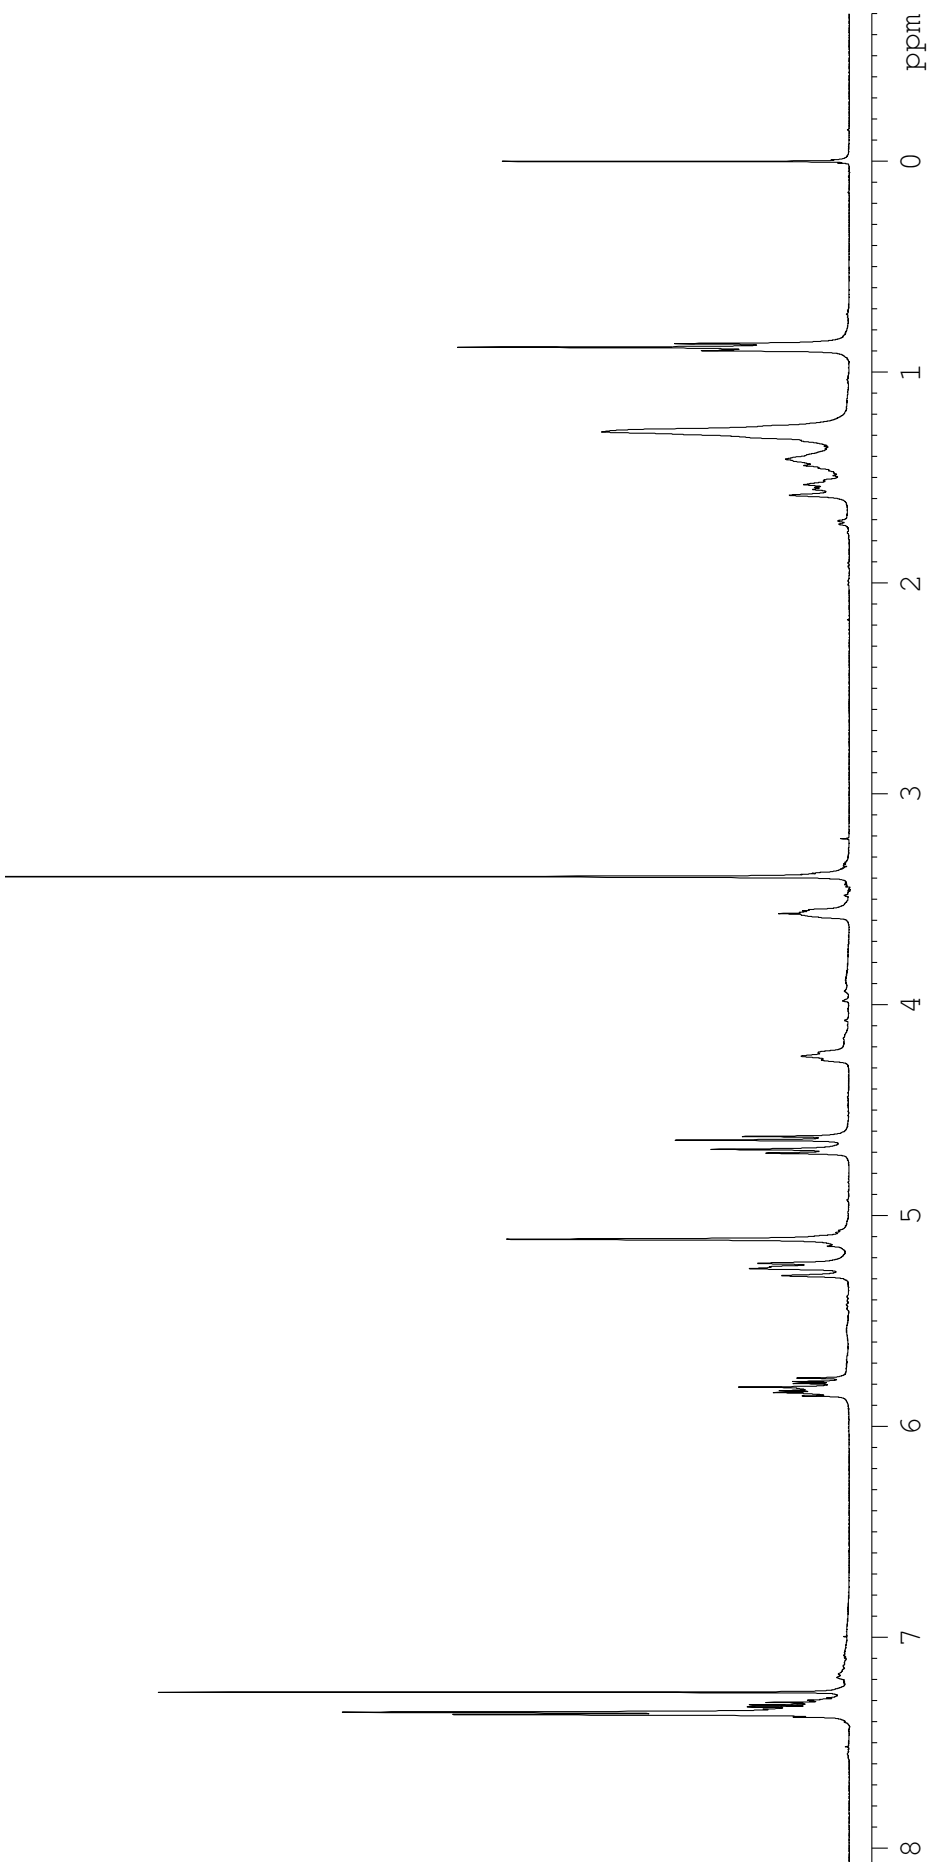

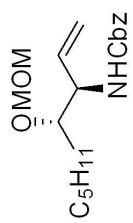

**15**

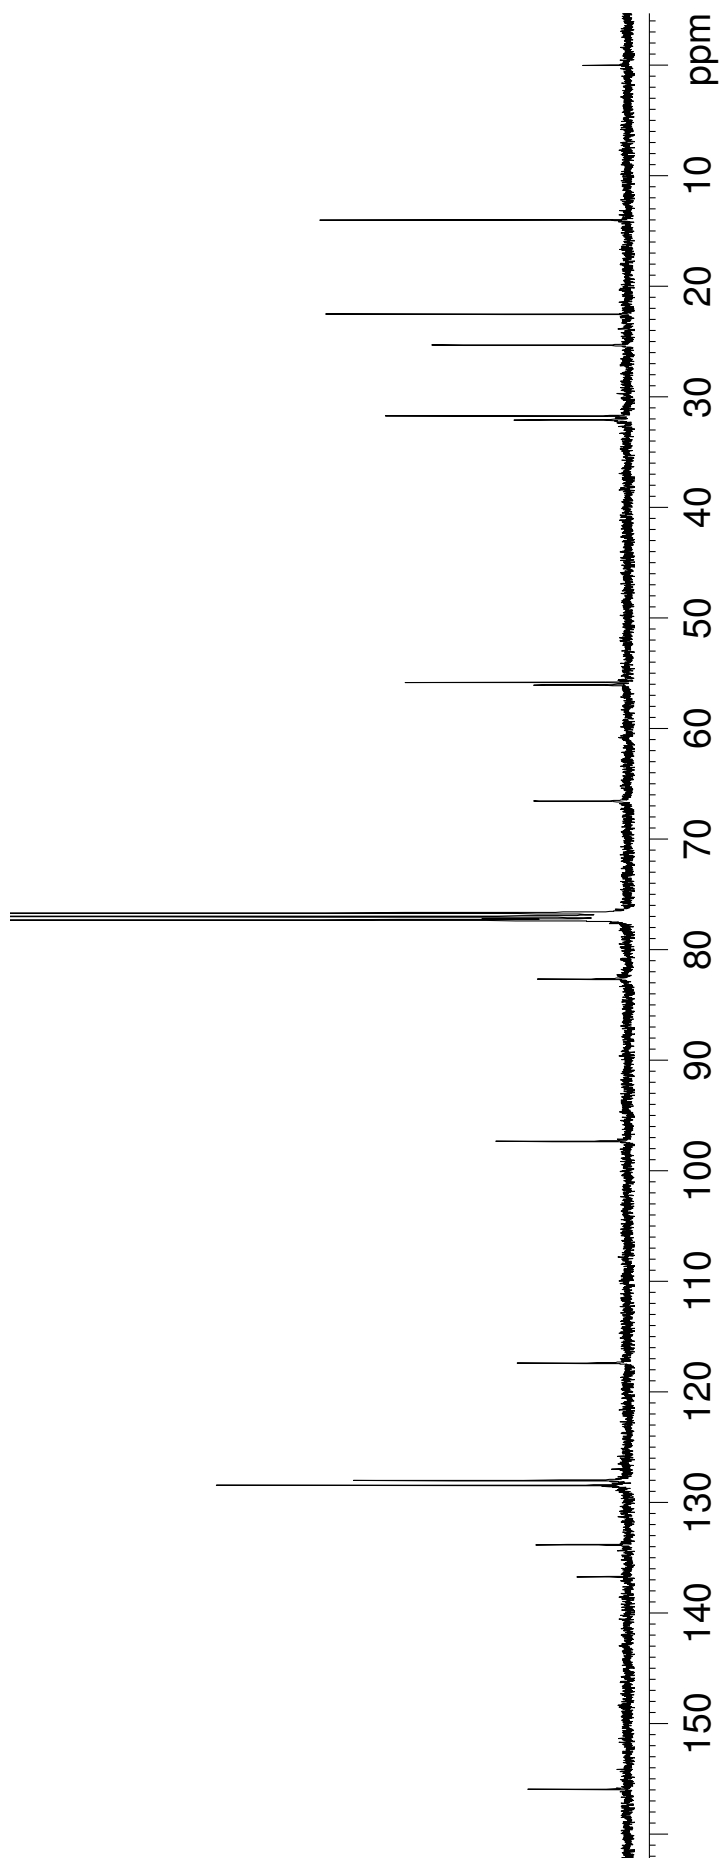

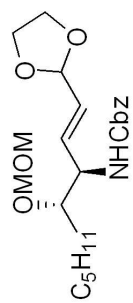

17

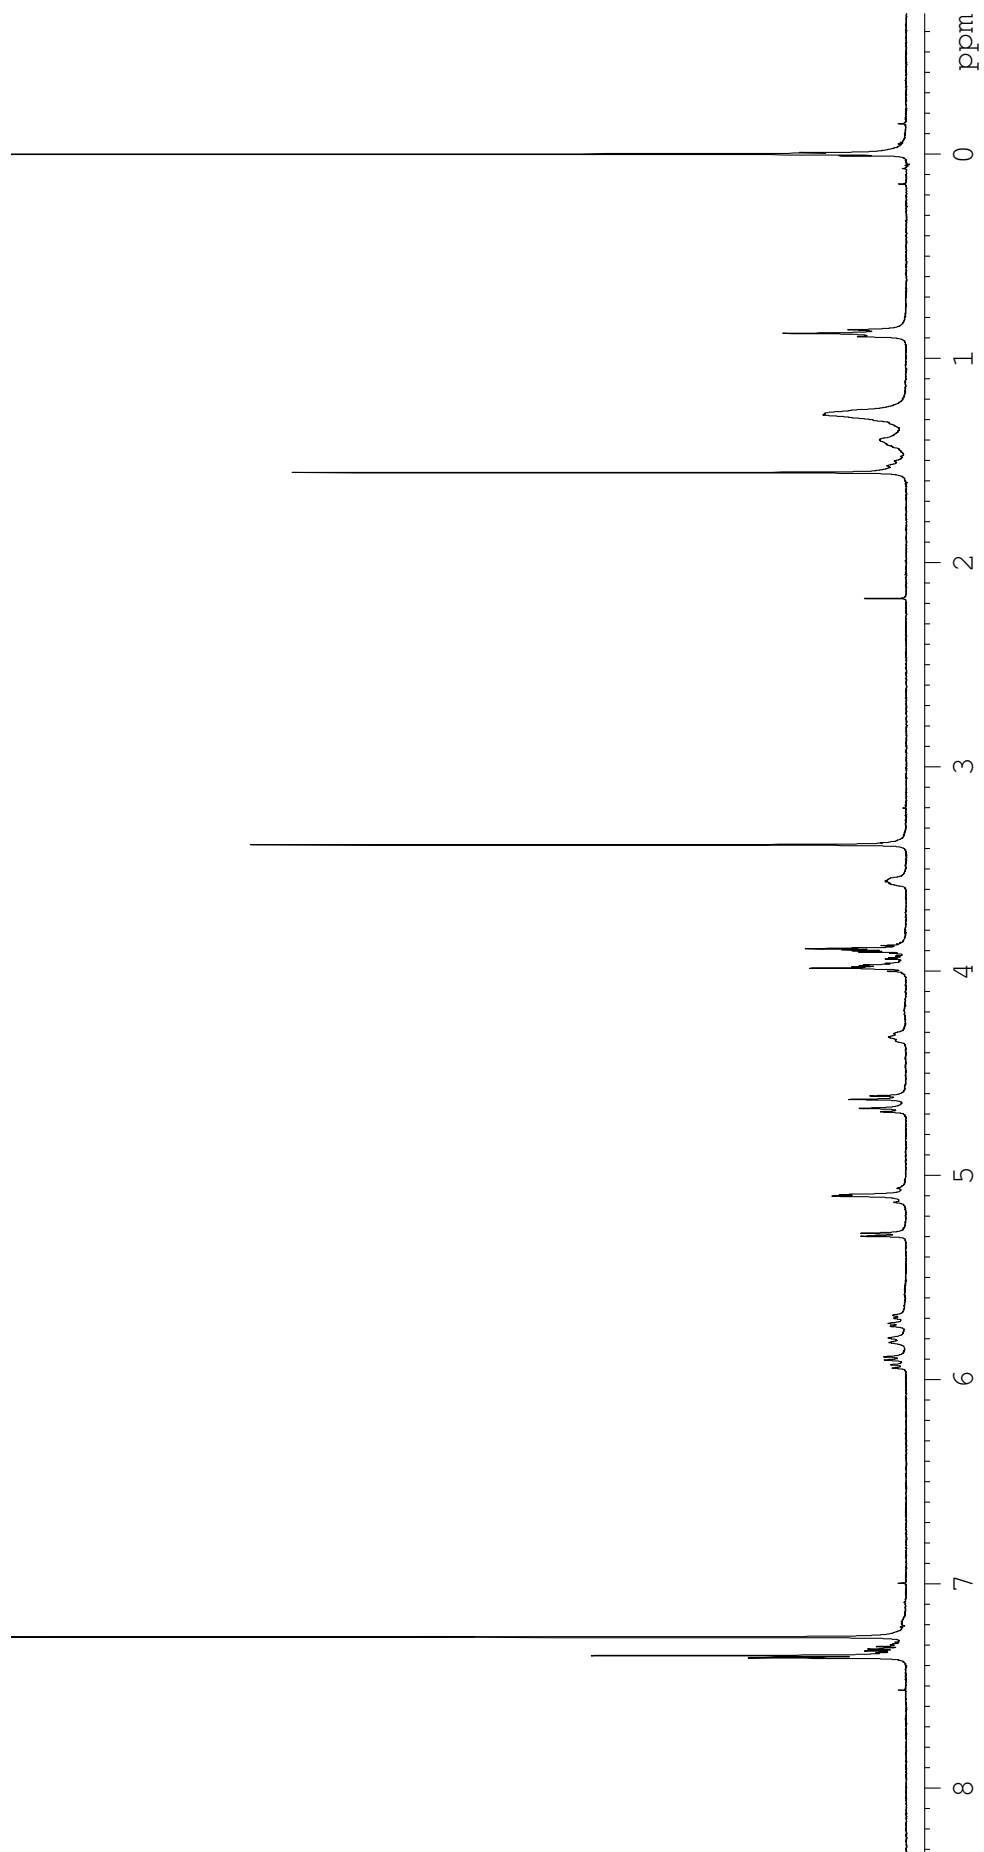

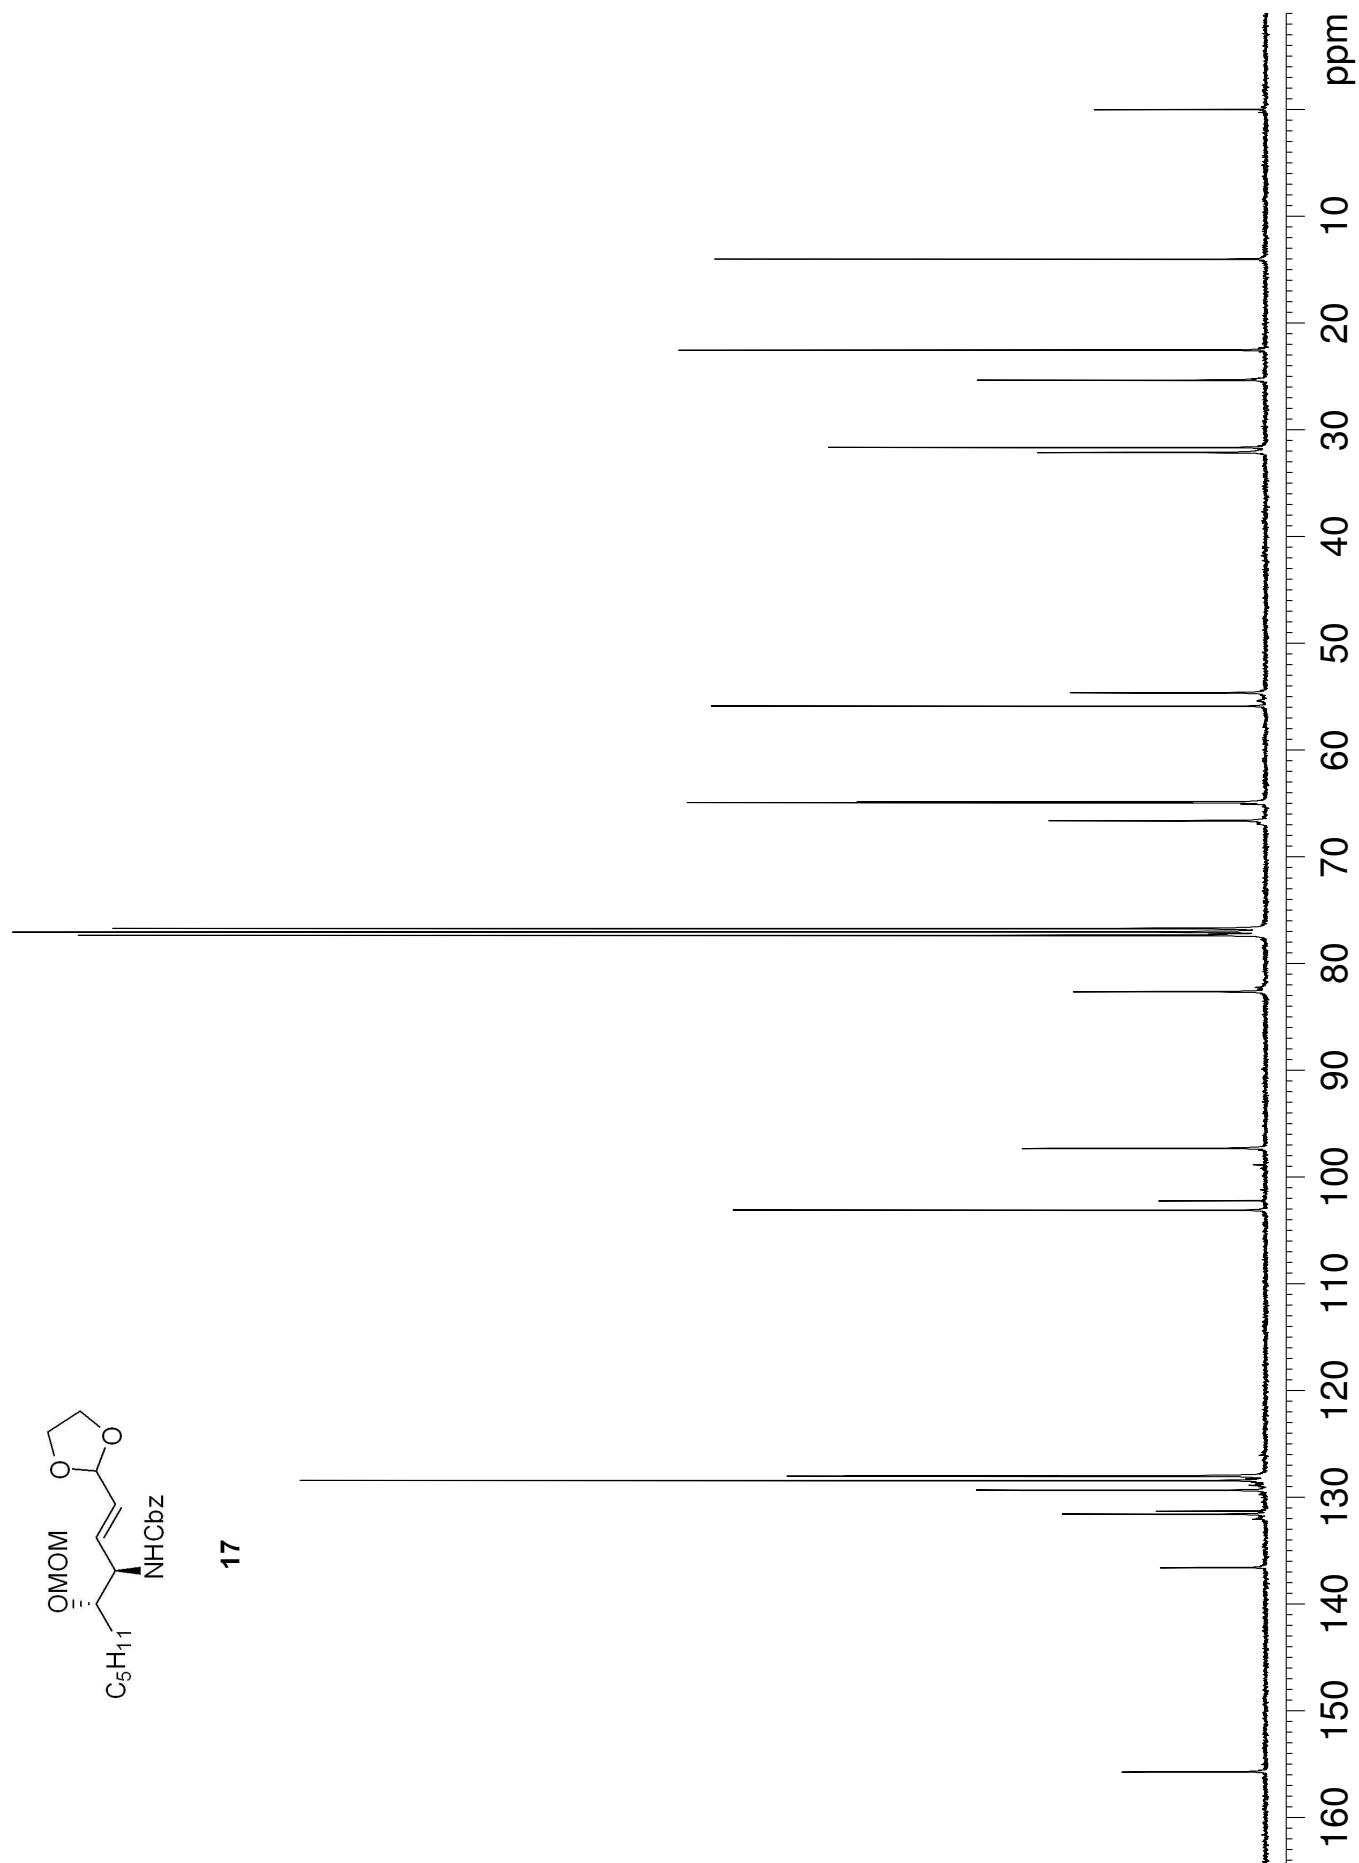

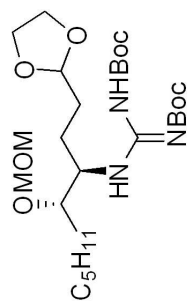

4

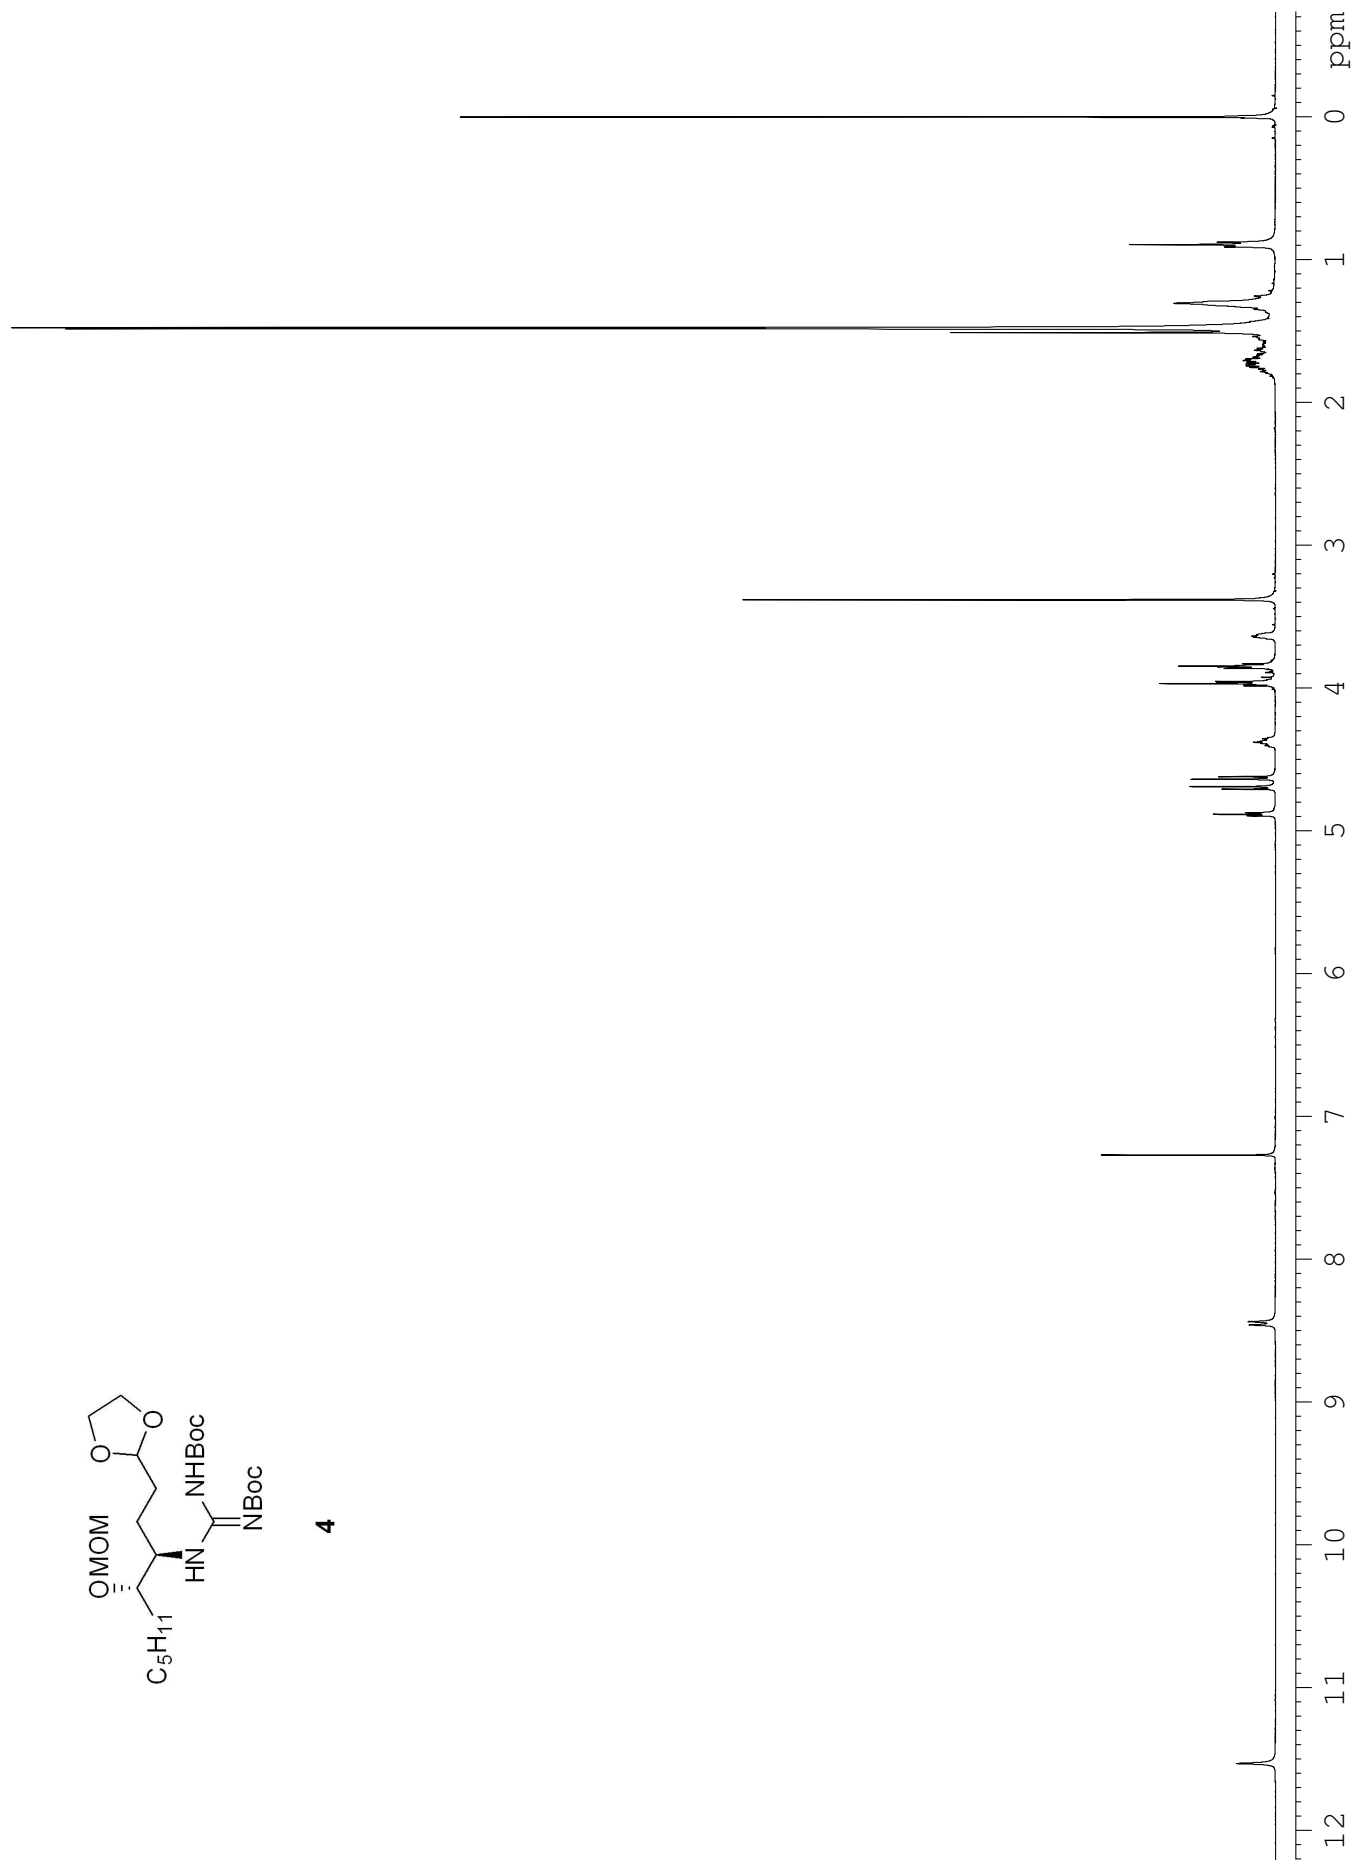



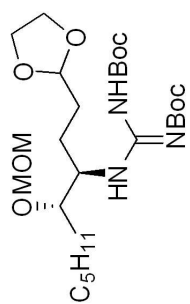

4

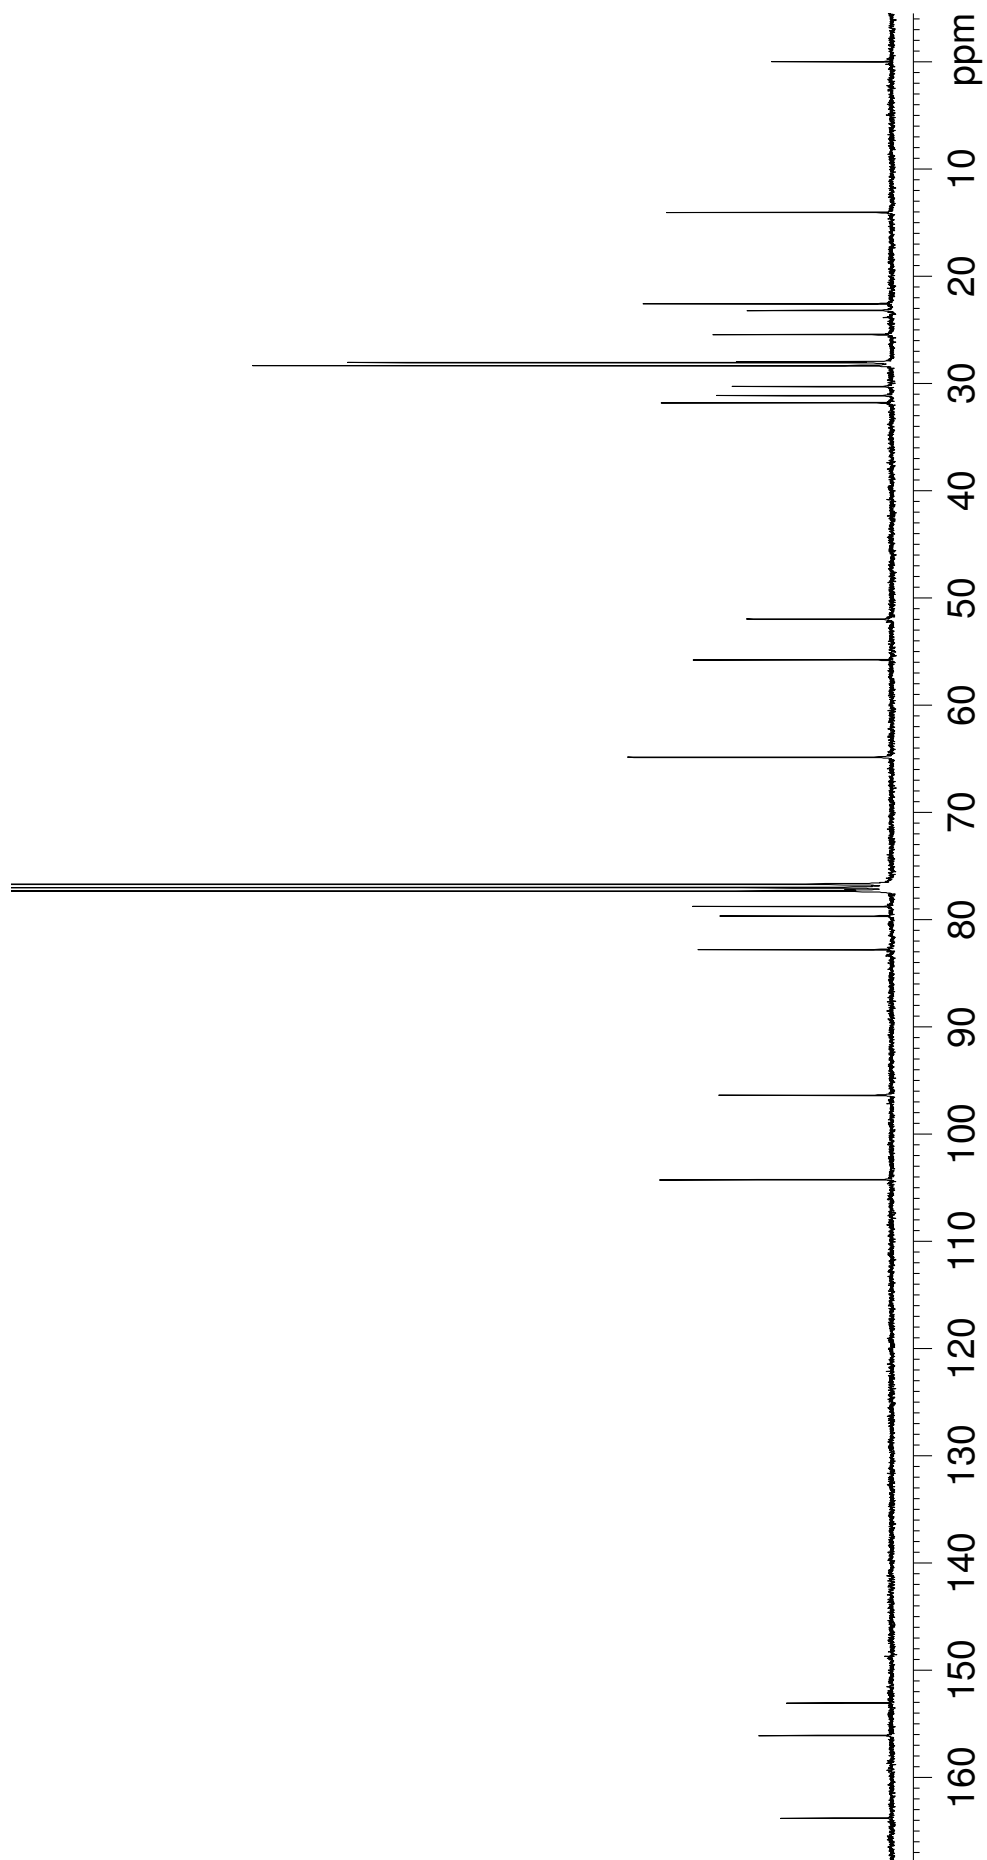

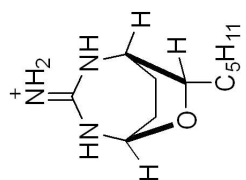

**3**

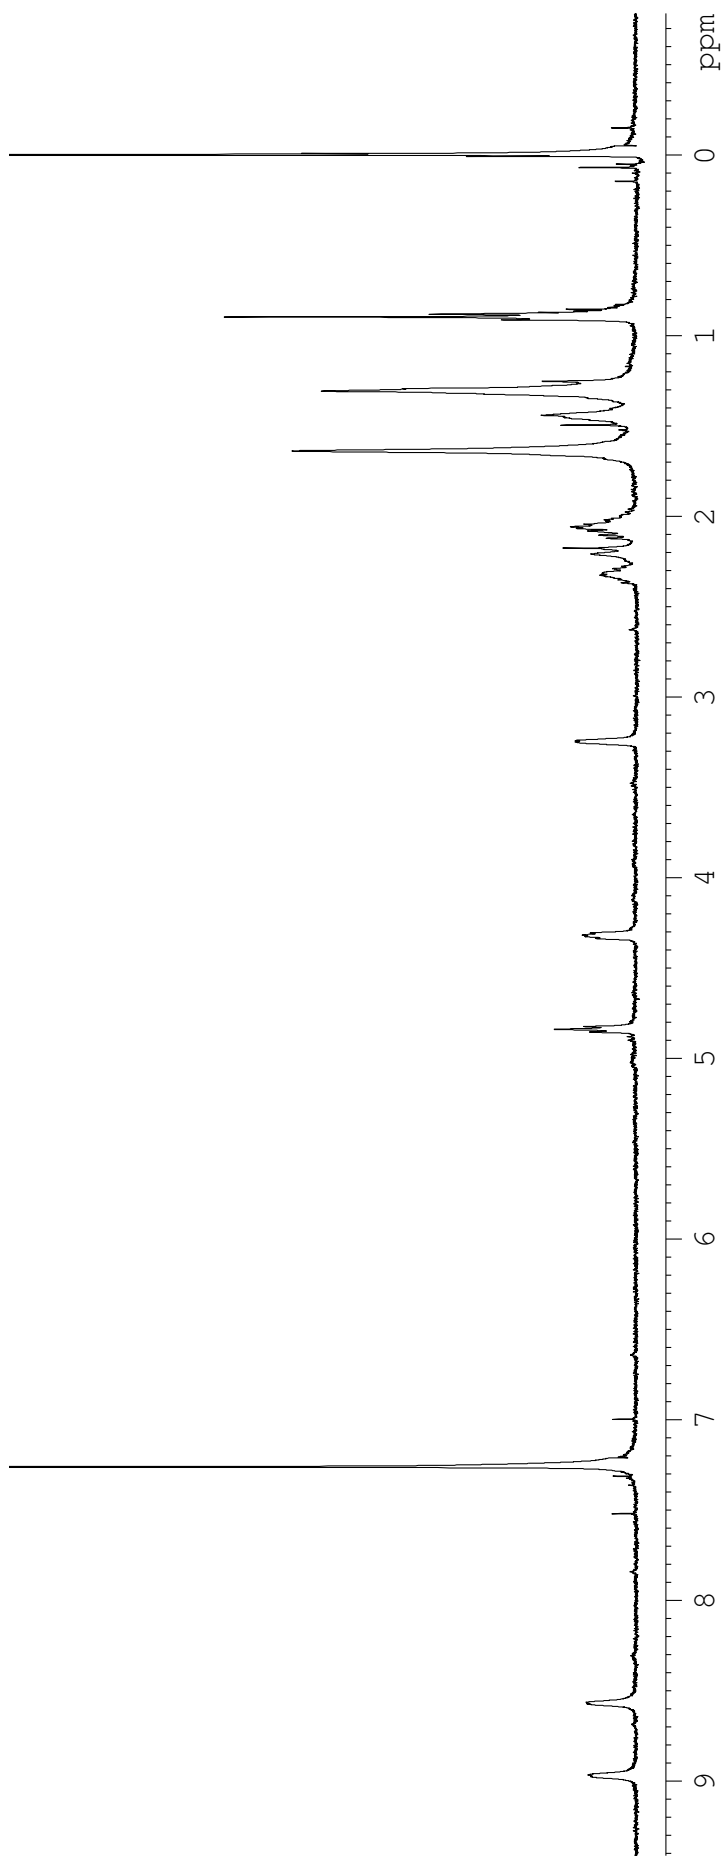

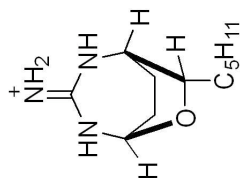

**3**

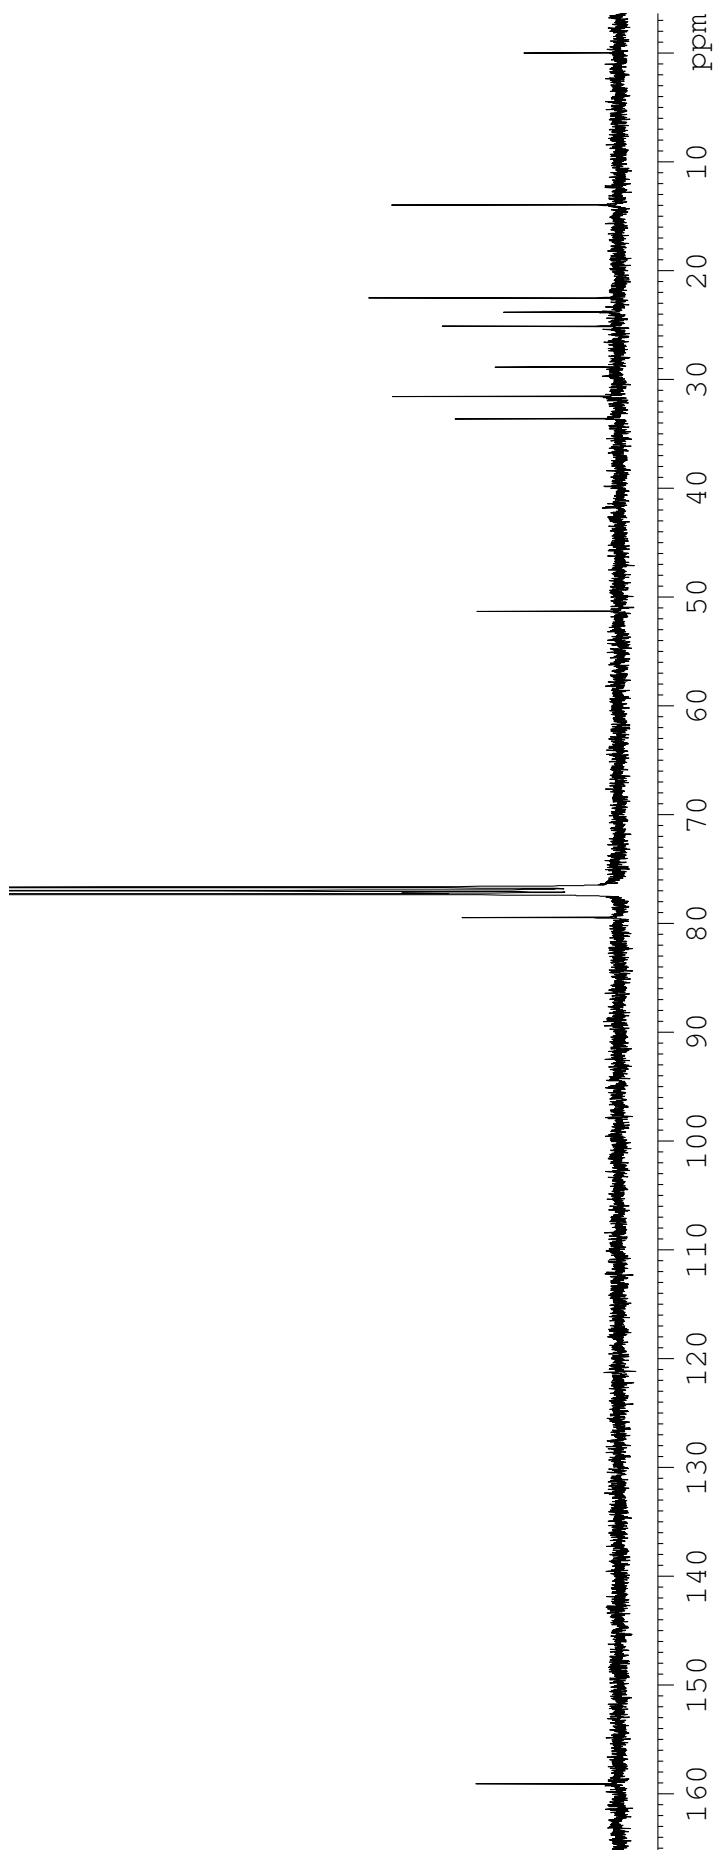

Supplement: c0ob00219d.pdf [file c0ob00219d.pdf]
